# Supplementary material
Source: publisher figshare collection journal article supplement (https://acs.figshare.com/ndownloader/files/5458034)
Supplement: Supplementary file 1 [file 5458034]

## Sheet: TOPKAT LOAELs
Chemical Name	CASRN	DSSTox_CID	Fracturing Fluid (FF) or Flowback/Produced Water (FB)	Has RfV or OSF available from EPA's hydraulic fracturing study	TOPKAT_Chronic_LOAEL (g/kg bw)	TOPKAT_Chronic_LOAEL (mg/kg bw)	TOPKAT_LD50 (g/kg bw)	OPS Score	Unknown Fragment Score	LD50 Score	Total Confidence Score	Confidence Classification
Acetaldehyde	75-07-0	2	FF		0.0946254	94.6254	0.874055	1	2	1	4	High
Acrolein	107-02-8	23	FF FB	Yes	0.04506	45.06	0.670614	1	2	1	4	High
Acrylamide	79-06-1	27	FF	Yes	0.0287015	28.7015	0.371562	2	2	1	5	High
Acrylic acid	79-10-7	28	FF	Yes	0.0467504	46.7504	0.513802	2	2	1	5	High
Acrylonitrile	107-13-1	29	FB	Yes	0.021379	21.379	0.191457	1	2	1	4	High
Aldrin	309-00-2	40	FB	Yes	0.000742699	0.742699	0.339293	2	2	1	5	High
Alkylbenzenesulfonate, linear	42615-29-2	41	FF		0.763348	763.348	5.20994	2	2	1	5	High
Ammonium citrate (2:1)	3012-65-5	79	FF		0.0557861	55.7861	0.926042	2	2	1	5	High
Anethole	104-46-1	86	FF		0.0216552	21.6552	0.809841	2	2	1	5	High
Aniline	62-53-3	90	FF	Yes	0.0372078	37.2078	0.519929	2	2	1	5	High
Benzene	71-43-2	135	FF FB	Yes	0.0776008	77.6008	2.26129	2	2	1	5	High
Benzo(a)pyrene	50-32-8	139	FB	Yes	0.0430285	43.0285	2.8891	2	2	1	5	High
Sodium benzoate	532-32-1	140	FF		0.436445	436.445	1.53743	2	2	1	5	High
Benzoic acid	65-85-0	143	FF	Yes	0.436445	436.445	1.53743	2	2	1	5	High
Benzyl alcohol	100-51-6	152	FB	Yes	0.209788	209.788	1.60213	2	2	1	5	High
Benzyl chloride	100-44-7	153	FF	Yes	0.115192	115.192	0.864318	2	2	1	5	High
Bis(2-chloroethyl) ether	111-44-4	168	FF FB	Yes	0.206295	206.295	0.443943	2	2	1	5	High
Diisopropanolamine	110-97-4	179	FF		0.118452	118.452	1.49559	2	2	1	5	High
Bisphenol A	80-05-7	182	FF	Yes	0.101267	101.267	6.10444	2	2	1	5	High
FD&C Blue no. 1	3844-45-9	189	FF		0.0432656	43.2656	4.37126	2	2	1	5	High
Bromodichloromethane	75-27-4	198	FB	Yes	0.0612222	61.2222	0.898433	2	2	1	5	High
1,3-Butadiene	106-99-0	203	FF	Yes	0.0287412	28.7412	0.563496	1	2	1	4	High
Chlorodibromomethane	124-48-1	300	FB	Yes	0.0737672	73.7672	1.01771	2	2	1	5	High
Chloroform	67-66-3	306	FB	Yes	0.0470683	47.0683	0.579952	2	2	1	5	High
Choline chloride	67-48-1	325	FF		0.0208219	20.8219	4.33944	2	2	1	5	High
Citric acid	77-92-9	332	FF		0.0557861	55.7861	0.926042	2	2	1	5	High
Coumarin	91-64-5	348	FF		0.070022	70.022	0.68606	2	2	1	5	High
(E)-Crotonaldehyde	123-73-9	351	FF	Yes	0.06313	63.13	1.21273	2	2	1	5	High
Cyclohexanone	108-94-1	359	FF	Yes	0.191486	191.486	1.61154	2	2	1	5	High
Cyclohexylamine sulfate	19834-02-7	362	FF		0.0521018	52.1018	0.68582	2	2	1	5	High
Dapsone	80-08-0	371	FF		0.090797	90.797	1.12366	2	2	1	5	High
p,p'-DDE	72-55-9	374	FB	Yes	0.0145719	14.5719	0.588813	2	2	1	5	High
Dibenz(a,h)anthracene	53-70-3	409	FB	Yes	0.0389354	38.9354	3.97296	2	2	1	5	High
Dieldrin	60-57-1	453	FB	Yes	0.000442415	0.442415	0.146804	2	2	1	5	High
Diethylene glycol	111-46-6	462	FF		0.505024	505.024	5.12338	2	2	1	5	High
Dimethylaminoethanol	108-01-0	505	FF		0.0319992	31.9992	0.70615	2	2	1	5	High
7,12-Dimethylbenz(a)anthracene	57-97-6	510	FB	Yes	0.0497473	49.7473	3.56216	2	2	1	5	High
N,N-Dimethylformamide	68-12-2	515	FF	Yes	0.0562263	56.2263	1.50057	2	2	1	5	High
1,4-Dioxane	123-91-1	533	FF FB	Yes	0.206931	206.931	1.09993	2	2	1	5	High
Trisodium ethylenediaminetetraacetate	150-38-9	556	FF		0.432801	432.801	3.12815	0	2	1	3	Medium
Epichlorohydrin	106-89-8	566	FF	Yes	0.0150441	15.0441	0.498777	2	2	1	5	High
Sodium erythorbate (1:1)	6381-77-7	570	FF		0.0170226	17.0226	2.34909	2	2	1	5	High
Ethanol	64-17-5	584	FF		0.0591679	59.1679	0.961281	1	2	1	4	High
Ethylbenzene	100-41-4	596	FF FB	Yes	0.225556	225.556	1.1823	2	2	1	5	High
Ethylene glycol	107-21-1	597	FF FB	Yes	0.130392	130.392	2.68881	2	2	1	5	High
Ethylene oxide	75-21-8	600	FF	Yes	0.0430681	43.0681	0.47136	1	2	1	4	High
2-Ethyl-1-hexanol	104-76-7	605	FF		0.605042	605.042	3.27139	2	2	1	5	High
Di(2-ethylhexyl) phthalate	117-81-7	607	FF FB	Yes	4.0405	4040.5	22.7616	2	2	1	5	High
Formaldehyde	50-00-0	637	FF	Yes	0.0663762	66.3762	0.482408	0	1	1	2	Low
Furfural	98-01-1	647	FF	Yes	0.0541353	54.1353	0.809235	2	2	1	5	High
L-Glutamic acid	56-86-0	659	FF		0.119637	119.637	1.298	2	2	1	5	High
Glycerol	56-81-5	662	FF		0.0776431	77.6431	1.48569	2	2	1	5	High
Heptachlor	76-44-8	679	FB	Yes	0.000926779	0.926779	0.185996	2	2	1	5	High
beta-Hexachlorocyclohexane	319-85-7	685	FB	Yes	0.0238877	23.8877	2.28848	2	2	1	5	High
Lindane	58-89-9	686	FB	Yes	0.0238877	23.8877	2.28848	2	2	1	5	High
Methenamine	100-97-0	692	FF		0.0123277	12.3277	0.424415	2	2	1	5	High
Indole	120-72-9	737	FF		0.0392805	39.2805	0.391662	2	2	1	5	High
Isobutene	115-11-7	748	FF		0.0809916	80.9916	2.37379	1	2	1	4	High
Isopropanol	67-63-0	762	FF FB		0.0813922	81.3922	1.34488	1	2	1	4	High
Aroclor 1248	12672-29-6	769	FB		0.0218697	21.8697	1.87168	2	2	1	5	High
D-Limonene	5989-27-5	778	FF	Yes	0.0617128	61.7128	2.46678	2	2	1	5	High
4-Methoxyphenol	150-76-5	828	FF		0.0731684	73.1684	1.47843	2	2	1	5	High
Methyl bromide	74-83-9	832	FB	Yes	0.0592816	59.2816	1.10402	0	2	1	3	Medium
N-Methyl-2-pyrrolidone	872-50-4	856	FF	Yes	0.113313	113.313	1.10852	2	2	1	5	High
Dichloromethane	75-09-2	868	FF FB	Yes	0.0396741	39.6741	1.14968	2	2	1	5	High
2-Methylnaphthalene	91-57-6	878	FB	Yes	0.102547	102.547	6.93365	2	2	1	5	High
Naphthalene	91-20-3	913	FF FB	Yes	0.0674786	67.4786	2.22413	2	2	1	5	High
Nitrilotriacetic acid	139-13-9	939	FF	Yes	0.103048	103.048	1.22923	2	2	1	5	High
Nitrilotriacetic acid trisodium monohydrate	18662-53-8	940	FF	Yes	0.103048	103.048	1.22923	2	2	1	5	High
N-Nitrosodiphenylamine	86-30-6	1030	FB	Yes	0.039408	39.408	0.559	2	2	1	5	High
Phenol	108-95-2	1124	FF FB	Yes	0.134476	134.476	0.641516	2	2	1	5	High
Phthalic anhydride	85-44-9	1159	FF	Yes	0.253939	253.939	1.10184	2	2	1	5	High
1-Propene	115-07-1	1205	FF		0.0291781	29.1781	0.84607	1	2	1	4	High
1,2-Propylene glycol	57-55-6	1206	FF FB	Yes	0.100379	100.379	2.28015	2	2	1	5	High
1,2-Propylene oxide	75-56-9	1207	FF	Yes	0.0201178	20.1178	0.768626	1	2	1	4	High
Amaranth	915-67-3	1232	FF		0.332021	332.021	0.642526	2	2	1	5	High
Safrole	94-59-7	1254	FB	Yes	0.0246657	24.6657	0.315881	2	2	1	5	High
Sodium bicarbonate	144-55-8	1269	FF		0.136804	136.804	1.09219	2	2	1	5	High
Sorbic acid	110-44-1	1277	FF		0.0711952	71.1952	1.14095	2	2	1	5	High
Styrene	100-42-5	1284	FF	Yes	0.0956972	95.6972	0.993399	2	2	1	5	High
Sucrose	57-50-1	1288	FF		0.0566014	56.6014	12.8716	0	1	1	2	Low
1,3-Dichloropropene	542-75-6	1307	FF	Yes	0.0159535	15.9535	0.382402	2	2	1	5	High
Tetrachloroethylene	127-18-4	1319	FB	Yes	0.0361868	36.1868	1.65031	2	2	1	5	High
Tetrakis(hydroxymethyl)phosphonium sulfate	55566-30-8	1331	FF		0.147626	147.626	9.58276	2	2	1	5	High
Sodium thiocyanate	540-72-7	1343	FF		0.132245	132.245	0.277416	1	1	1	3	Medium
Thiourea	62-56-6	1348	FF	Yes	0.0456202	45.6202	0.114351	2	2	1	5	High
Toluene	108-88-3	1360	FF FB	Yes	0.162859	162.859	2.57479	2	2	1	5	High
Bromoform	75-25-2	1374	FB	Yes	0.0848345	84.8345	0.585903	2	2	1	5	High
Triethanolamine	102-71-6	1392	FF		0.216954	216.954	3.70367	2	2	1	5	High
Triethylene glycol	112-27-6	1393	FF		0.657444	657.444	4.99102	2	2	1	5	High
1,2,4-Trimethylbenzene	95-63-6	1402	FF FB		0.0915098	91.5098	3.49547	2	2	1	5	High
Triisopropanolamine	122-20-3	1415	FF		0.0574662	57.4662	4.50981	2	2	1	5	High
Urea	57-13-6	1426	FF		0.0638618	63.8618	0.326156	1	2	1	4	High
Xylenes	1330-20-7	1446	FF FB	Yes	0.110378	110.378	3.71326	2	2	1	5	High
FD&C Yellow 5	1934-21-0	1455	FF		0.113678	113.678	2.13429	2	2	1	5	High
FD&C Yellow 6	2783-94-0	1456	FF		0.18491	184.91	0.885759	2	2	1	5	High
Acetone	67-64-1	1482	FF FB	Yes	0.119465	119.465	0.831202	1	2	1	4	High
Butanoic acid	107-92-6	1515	FB		0.125085	125.085	1.74765	2	2	1	5	High
Methyl ethyl ketone	78-93-3	1516	FB	Yes	0.0832286	83.2286	1.14946	2	2	1	5	High
Fumaric acid	110-17-8	1518	FF		0.115652	115.652	1.35253	2	2	1	5	High
2-(2-Butoxyethoxy)ethanol	112-34-5	1519	FF	Yes	0.841999	841.999	6.59502	2	2	1	5	High
Chloromethane	74-87-3	1541	FB		0.0331902	33.1902	0.97176	0	2	1	3	Medium
Glyoxylic acid	298-12-4	1594	FF		0.162847	162.847	1.20761	2	2	1	5	High
Heptanoic acid	111-14-8	1600	FB		0.622329	622.329	2.81104	2	2	1	5	High
Hexanedioic acid	124-04-9	1605	FF	Yes	0.561814	561.814	3.61844	2	2	1	5	High
Hexanoic acid	142-62-1	1607	FB		0.558369	558.369	2.15354	2	2	1	5	High
1-[2-(2-Methoxy-1-methylethoxy)-1-methylethoxy]-2-propanol	20324-33-8	1616	FF		0.0788887	78.8887	5.95799	2	2	1	5	High
2-Methylpropanoic acid	79-31-2	1636	FB		0.213912	213.912	1.58772	2	2	1	5	High
Pentanoic acid	109-52-4	1655	FB		0.294184	294.184	1.71611	2	2	1	5	High
Undecane	1120-21-4	1689	FF		0.736939	736.939	5.50448	2	2	1	5	High
Sodium salicylate	54-21-7	1708	FF		0.597655	597.655	1.63853	2	2	1	5	High
Methanol	67-56-1	1731	FF FB	Yes	0.0489772	48.9772	1.08307	0	2	1	3	Medium
1-Propanol	71-23-8	1739	FF		0.0720435	72.0435	2.06939	1	2	1	4	High
1-Butanol	71-36-3	1740	FF	Yes	0.116883	116.883	1.49022	2	2	1	5	High
1-Pentanol	71-41-0	1741	FF		0.296092	296.092	1.84377	2	2	1	5	High
Tetramethylammonium chloride	75-57-0	1749	FF		0.0216767	21.6767	2.78871	2	2	1	5	High
2-Methyl-1-propanol	78-83-1	1759	FF	Yes	0.110772	110.772	1.39162	2	2	1	5	High
1-Amino-2-propanol	78-96-6	1764	FF		0.0348394	34.8394	0.661573	2	2	1	5	High
Diethyl phthalate	84-66-2	1780	FB	Yes	1.00396	1003.96	9.90232	2	2	1	5	High
Dibutyl phthalate	84-74-2	1781	FB	Yes	2.09398	2093.98	10.8663	2	2	1	5	High
Quinoline	91-22-5	1798	FF	Yes	0.0394025	39.4025	0.49738	2	2	1	5	High
1,2-Dimethylbenzene	95-47-6	1807	FF		0.207708	207.708	1.37383	2	2	1	5	High
o-Cresol	95-48-7	1808	FB	Yes	0.229191	229.191	0.625706	2	2	1	5	High
2-Butanone oxime	96-29-7	1821	FF		0.34314	343.14	0.418019	2	2	1	5	High
Cumene	98-82-8	1827	FF FB	Yes	0.246186	246.186	0.935488	2	2	1	5	High
Acetophenone	98-86-2	1828	FF FB	Yes	0.273788	273.788	0.971542	2	2	1	5	High
Diphenyl oxide	101-84-8	1847	FF		0.0577133	57.7133	0.73906	2	2	1	5	High
4-Nonylphenol	104-40-5	1857	FF		0.86117	861.17	3.86323	2	2	1	5	High
2,4-Dimethylphenol	105-67-9	1864	FB	Yes	0.112441	112.441	1.63086	2	2	1	5	High
p-Xylene	106-42-3	1868	FF		0.0854777	85.4777	3.03087	2	2	1	5	High
p-Cresol	106-44-5	1869	FB		0.0954769	95.4769	1.49231	2	2	1	5	High
Ethylenediamine	107-15-3	1881	FF	Yes	0.0612179	61.2179	0.572102	2	2	1	5	High
Propargyl alcohol	107-19-7	1883	FF	Yes	0.0340791	34.0791	0.731211	1	0	1	2	Low
2-Methyl-2,4-pentanediol	107-41-5	1885	FF		0.0350607	35.0607	2.86532	2	2	1	5	High
4-Methyl-2-pentanone	108-10-1	1889	FF		0.0742542	74.2542	0.812317	2	2	1	5	High
Cyclohexanol	108-93-0	1894	FF		0.0718118	71.8118	1.1937	2	2	1	5	High
2-Methylpyridine	109-06-8	1899	FB		0.084072	84.072	1.29918	2	2	1	5	High
Pyrrole	109-97-7	1910	FF		0.0486797	48.6797	0.484586	2	2	1	5	High
Hexane	110-54-3	1917	FF		0.437672	437.672	2.46153	2	2	1	5	High
Cyclohexane	110-82-7	1923	FF		0.173354	173.354	1.97365	2	2	1	5	High
Pyridine	110-86-1	1924	FB	Yes	0.0694832	69.4832	0.955449	2	2	1	5	High
1-Hexanol	111-27-3	1931	FF		0.341307	341.307	2.22811	2	2	1	5	High
Diethanolamine	111-42-2	1932	FF		0.271662	271.662	1.71379	2	2	1	5	High
1-Octanol	111-87-5	1940	FF		0.453466	453.466	2.46358	2	2	1	5	High
2-(2-Ethoxyethoxy)ethanol	111-90-0	1941	FF	Yes	0.663424	663.424	3.4864	2	2	1	5	High
1-Decanol	112-30-1	1946	FF		0.493545	493.545	3.39081	2	2	1	5	High
1-Tridecanol	112-70-9	1947	FF		0.529395	529.395	5.17212	2	2	1	5	High
2-Methyl-3-butyn-2-ol	115-19-5	1949	FF		0.0219331	21.9331	0.955898	2	2	1	5	High
Dioctyl phthalate	117-84-0	1956	FB		4.73778	4737.78	21.3555	1	2	1	4	High
Ethyl salicylate	118-61-6	1958	FF		0.443669	443.669	3.08131	2	2	1	5	High
1,2,4-Trichlorobenzene	120-82-1	1965	FB	Yes	0.0445089	44.5089	0.609841	2	2	1	5	High
4-Hydroxy-3-methoxybenzaldehyde	121-33-5	1969	FF		0.168753	168.753	3.27601	2	2	1	5	High
Diphenylamine	122-39-4	1975	FB	Yes	0.0308033	30.8033	0.631713	2	2	1	5	High
Tributyl phosphate	126-73-8	1986	FF	Yes	0.144154	144.154	1.26674	2	2	1	5	High
Ethanolamine	141-43-5	2000	FF		0.0449469	44.9469	0.769622	2	2	1	5	High
Ethyl acetate	141-78-6	2001	FF	Yes	0.129068	129.068	3.75895	2	2	1	5	High
2-Hydroxyethyl acrylate	818-61-1	2123	FF		0.0428791	42.8791	2.25762	2	2	1	5	High
Daidzein	486-66-8	2310	FF		0.0885248	88.5248	1.66053	2	2	1	5	High
sec-Butylbenzene	135-98-8	2333	FB		0.20084	200.84	1.16103	2	2	1	5	High
Butylbenzene	104-51-8	2472	FB	Yes	0.688451	688.451	3.15452	2	2	1	5	High
D-Glucose	50-99-7	2910	FF		0.0319535	31.9535	3.88375	2	2	1	5	High
Docusate sodium	577-11-7	2959	FF		0.280181	280.181	6.48076	2	2	1	5	High
Ethylenediaminetetraacetic acid	60-00-4	2977	FF		0.432801	432.801	3.12763	0	2	1	3	Medium
Lactic acid	50-21-5	3192	FF		0.157264	157.264	1.81295	2	2	1	5	High
Lactose	63-42-3	3193	FF		0.0925673	92.5673	13.0762	2	2	1	5	High
D-Glucitol	50-70-4	3588	FF		0.290944	290.944	4.83309	2	2	1	5	High
Triethylenetetramine	112-24-3	3702	FF		0.499112	499.112	3.66653	2	2	1	5	High
Tromethamine	77-86-1	3723	FF		0.0448117	44.8117	0.955649	2	2	1	5	High
Ammonium acetate	631-61-8	3873	FF		0.18331	183.31	1.24969	1	2	1	4	High
Benzo(b)fluoranthene	205-99-2	3907	FB	Yes	0.0389798	38.9798	3.27359	2	2	1	5	High
Benzo(g,h,i)perylene	191-24-2	3908	FB		0.0291386	29.1386	2.86154	2	2	1	5	High
Benzo(k)fluoranthene	207-08-9	3909	FB	Yes	0.0389798	38.9798	4.1793	2	2	1	5	High
Carbon disulfide	75-15-0	3947	FB	Yes	0.126063	126.063	0.54202	2	2	1	5	High
Cyanide	57-12-5	3991	FB	Yes	0.0352776	35.2776	0.223738	0	1	1	2	Low
2-Ethoxyethanol	110-80-5	4087	FF	Yes	0.322367	322.367	1.97192	2	2	1	5	High
2-Butoxyethanol	111-76-2	4097	FF	Yes	0.70708	707.08	4.32917	2	2	1	5	High
Fluoranthene	206-44-0	4104	FB	Yes	0.044565	44.565	2.2937	2	2	1	5	High
Fluorene	86-73-7	4105	FB	Yes	0.0951224	95.1224	1.47141	2	2	1	5	High
Formic acid	64-18-6	4115	FF FB	Yes	0.124897	124.897	1.10546	1	1	1	3	Medium
Heptachlor epoxide	1024-57-3	4126	FB	Yes	0.000595011	0.595011	0.103252	2	2	1	5	High
Heptane	142-82-5	4127	FF		0.506111	506.111	3.33381	2	2	1	5	High
delta-Hexachlorocyclohexane	319-86-8	4134	FB		0.0238877	23.8877	2.28848	2	2	1	5	High
Indeno(1,2,3-cd)pyrene	193-39-5	4153	FB	Yes	0.0386344	38.6344	4.99709	2	2	1	5	High
2-Methoxyethanol	109-86-4	4182	FF	Yes	0.0985585	98.5585	3.65102	2	2	1	5	High
m-Cresol	108-39-4	4200	FB	Yes	0.12329	123.29	1.28638	2	2	1	5	High
Phenanthrene	85-01-8	4254	FF FB		0.0612861	61.2861	2.66549	2	2	1	5	High
1-Methoxy-2-propanol	107-98-2	4284	FF		0.0657863	65.7863	3.74118	2	2	1	5	High
Pyrene	129-00-0	4289	FB	Yes	0.0360816	36.0816	1.97684	2	2	1	5	High
Acetic acid	64-19-7	4394	FF FB		0.18331	183.31	1.24969	1	2	1	4	High
Acetic anhydride	108-24-7	4395	FF		0.199319	199.319	2.48118	2	2	1	5	High
Benzenesulfonic acid	98-11-3	4568	FF		0.248762	248.762	2.41763	2	2	1	5	High
Benzyltrimethylammonium chloride	56-93-9	4600	FF		0.0618712	61.8712	3.63528	2	2	1	5	High
Bronopol	52-51-7	4652	FF		0.0213513	21.3513	0.367315	2	2	1	5	High
Butane	106-97-8	4665	FF		0.0957388	95.7388	1.77335	1	2	1	4	High
Butyl glycidyl ether	2426-08-6	4691	FF		0.16877	168.77	1.67118	2	2	1	5	High
tert-Butyl hydroperoxide	75-91-2	4693	FF		0.0834695	83.4695	2.87679	2	2	1	5	High
tert-Butyl perbenzoate	614-45-9	4699	FF		0.194117	194.117	1.56216	2	2	1	5	High
N-(3-Chloroallyl)hexaminium chloride	4080-31-3	4760	FF		0.00149449	1.49449	0.563933	2	2	1	5	High
3-Phenylprop-2-enal	104-55-2	4835	FF		0.135687	135.687	1.13256	2	2	1	5	High
3,7-Dimethyl-2,6-octadienal	5392-40-5	4836	FF		0.0918445	91.8445	3.36629	2	2	1	5	High
Dazomet	533-74-4	4902	FF		0.0105684	10.5684	0.281055	2	2	1	5	High
1,6-Hexanediamine	124-09-4	4922	FF		0.280153	280.153	0.888083	2	2	1	5	High
Dibromoacetonitrile	3252-43-5	4940	FF		0.0882632	88.2632	0.287849	2	2	1	5	High
1,2-Dibromo-2,4-dicyanobutane	35691-65-7	4944	FF		0.0598747	59.8747	0.0852569	2	2	1	5	High
2-(Dibutylamino)ethanol	102-81-8	4953	FF		0.201897	201.897	1.54066	2	2	1	5	High
Sodium dichloroisocyanurate	2893-78-9	4994	FF		0.0164317	16.4317	2.11432	2	2	1	5	High
2,6-Dichlorophenol	87-65-0	5004	FB		0.0778932	77.8932	0.345891	2	2	1	5	High
Diethylene glycol monomethyl ether	111-77-3	5049	FF		0.347877	347.877	4.6801	2	2	1	5	High
Diethylenetriamine	111-40-0	5050	FF		0.278952	278.952	1.32804	2	2	1	5	High
Diisobutyl ketone	108-83-8	5080	FF		0.0806868	80.6868	1.29311	2	2	1	5	High
Dimethyl adipate	627-93-0	5096	FF		0.418297	418.297	6.76513	2	2	1	5	High
3-(Dimethylamino)propylamine	109-55-7	5102	FF		0.0734419	73.4419	0.521864	2	2	1	5	High
Dimethyl glutarate	1119-40-0	5122	FF		0.275988	275.988	5.06271	2	2	1	5	High
Dimethyl succinate	106-65-0	5152	FF		0.130656	130.656	4.26905	2	2	1	5	High
Dipropylene glycol	25265-71-8	5186	FF		0.107334	107.334	5.22473	2	2	1	5	High
Ethoxylated dodecyl alcohol	9002-92-0	5218	FF		1.43616	1436.16	9.86593	2	2	1	5	High
2-Ethyl-2-hexenal	645-62-5	5295	FF		0.180127	180.127	3.58334	2	2	1	5	High
Formamide	75-12-7	5337	FF		0.0538328	53.8328	1.08036	1	1	1	3	Medium
Furfuryl alcohol	98-00-0	5347	FF		0.0319384	31.9384	1.43676	2	2	1	5	High
Glutaraldehyde	111-30-8	5355	FF		0.397929	397.929	2.69709	2	2	1	5	High
Glycolic acid	79-14-1	5363	FF		0.0772748	77.2748	1.17281	2	2	1	5	High
Glyoxal	107-22-2	5364	FF	Yes	0.193003	193.003	0.887779	1	2	1	4	High
1,3,5-Triazine-1,3,5(2H,4H,6H)-triethanol	4719-04-4	5394	FF		0.0770499	77.0499	6.00416	2	2	1	5	High
2-Methylbutane	78-78-4	5468	FF		0.0619617	61.9617	0.963856	2	2	1	5	High
Isopentyl alcohol	123-51-3	5469	FF		0.0955786	95.5786	2.26153	2	2	1	5	High
Methane	74-82-8	5545	FF		0.0213984	21.3984	0.337102	0	2	1	3	Medium
N-Methyldiethanolamine	105-59-9	5591	FF		0.149182	149.182	1.59954	2	2	1	5	High
N,N'-Methylenebisacrylamide	110-26-9	5595	FF		0.0233576	23.3576	2.32502	2	2	1	5	High
Methylene bis(thiocyanate)	6317-18-6	5599	FF		0.103378	103.378	0.110436	2	2	1	5	High
N-Methylethanolamine	109-83-1	5603	FF		0.0456131	45.6131	0.665381	2	2	1	5	High
Methyl salicylate	119-36-8	5659	FF		0.297481	297.481	1.96784	2	2	1	5	High
Methyl vinyl ketone	78-94-4	5671	FF		0.0417726	41.7726	0.414231	2	2	1	5	High
Isopropylamine	75-31-0	5682	FF		0.0467968	46.7968	0.655085	1	2	1	4	High
Morpholine	110-91-8	5688	FF		0.0566832	56.6832	0.843012	2	2	1	5	High
Oleic acid	112-80-1	5809	FF		0.333208	333.208	6.68692	2	2	1	5	High
Pentaethylenehexamine	4067-16-7	5843	FF		1.47094	1470.94	17.8998	2	2	1	5	High
Pentane	109-66-0	5846	FF		0.219574	219.574	1.86781	2	2	1	5	High
Peracetic acid	79-21-0	5853	FF		0.252936	252.936	4.66203	2	2	1	5	High
Ethylene	74-85-1	5931	FF		0.0327737	32.7737	0.745057	0	2	1	3	Medium
Potassium oleate	143-18-0	5949	FF		0.333208	333.208	6.68692	2	2	1	5	High
Propionic acid	79-09-4	5961	FB		0.0822087	82.2087	1.13194	2	2	1	5	High
1-tert-Butoxy-2-propanol	57018-52-7	5967	FF		0.0334683	33.4683	3.45323	2	2	1	5	High
Sodium dodecyl sulfate	151-21-3	6031	FF		0.507736	507.736	5.83144	2	2	1	5	High
Sodium ethasulfate	126-92-1	6033	FF		0.483308	483.308	4.44205	2	2	1	5	High
Sodium 2-mercaptobenzothiolate	2492-26-4	6035	FF		0.155977	155.977	0.228053	2	2	1	5	High
Sulfan blue	129-17-9	6065	FF		0.025315	25.315	3.82833	2	2	1	5	High
Tetraethylenepentamine	112-57-2	6108	FF		0.815542	815.542	9.24234	2	2	1	5	High
Thioglycolic acid	68-11-1	6141	FF		0.148996	148.996	1.13821	2	2	1	5	High
1,2,3-Trichlorobenzene	87-61-6	6193	FB		0.0513262	51.3262	0.601036	2	2	1	5	High
Triethyl phosphate	78-40-0	6228	FF		0.0569412	56.9412	0.0346545	2	2	0	4	High
Trimethylamine	75-50-3	6238	FF		0.0254763	25.4763	0.424513	1	2	1	4	High
Sodium xylenesulfonate	1300-72-7	6302	FF		0.144073	144.073	4.6855	2	2	1	5	High
2-Mercaptoethanol	60-24-2	6343	FF		0.173538	173.538	2.75675	2	2	1	5	High
Ethylenediaminetetraacetic acid tetrasodium salt	64-02-8	6350	FF		0.432801	432.801	3.12815	0	2	1	3	Medium
Trisodium citrate	68-04-2	6363	FF		0.0557861	55.7861	0.926042	2	2	1	5	High
Ethane	74-84-0	6377	FF		0.0510891	51.0891	0.819512	0	2	1	3	Medium
Ethyne	74-86-2	6379	FF		0.0222579	22.2579	0.552486	0	1	1	2	Low
Propane	74-98-6	6386	FF		0.0560558	56.0558	1.3155	1	2	1	4	High
Isobutane	75-28-5	6401	FF		0.0572711	57.2711	0.903144	1	2	1	4	High
Symclosene	87-90-1	6523	FF		0.0214206	21.4206	1.25546	2	2	1	5	High
Isoascorbic acid	89-65-6	6537	FF		0.0170226	17.0226	2.34909	2	2	1	5	High
alpha-Terpineol	98-55-5	6625	FF		0.0177203	17.7203	1.2085	2	2	1	5	High
p-Cymene	99-87-6	6645	FB		0.115774	115.774	1.43138	2	2	1	5	High
Citronellol	106-22-9	6726	FF		0.109133	109.133	5.47809	2	2	1	5	High
Butene	25167-67-3	6746	FF		0.0211588	21.1588	0.417811	1	2	1	4	High
4-Methyl-2-pentanol	108-11-2	6781	FF		0.042811	42.811	1.5005	2	2	1	5	High
Propylene carbonate	108-32-7	6789	FF		0.0198131	19.8131	1.19883	2	2	1	5	High
1,3,5-Trimethylbenzene	108-67-8	6797	FF FB		0.0630277	63.0277	3.7408	2	2	1	5	High
Coconut trimethylammonium chloride	61789-18-2	6900	FF		0.16764	167.64	7.44726	2	2	1	5	High
N,N,N-Trimethyloctadecan-1-aminium chloride	112-03-8	6902	FF		0.164722	164.722	14.7984	2	2	1	5	High
2-(2-Ethoxyethoxy)ethyl acetate	112-15-2	6905	FF		0.804949	804.949	3.00054	2	2	1	5	High
Dodecane	112-40-3	6913	FF		0.759916	759.916	6.38272	2	2	1	5	High
1-Undecanol	112-42-5	6915	FF		0.508411	508.411	3.92778	2	2	1	5	High
Tetraethylene glycol	112-60-7	6922	FF		0.880529	880.529	7.99109	2	2	1	5	High
1-Octadecene	112-88-9	6932	FF		0.315575	315.575	4.87508	2	2	1	5	High
Dodecylbenzene	123-01-3	6994	FF		2.03817	2038.17	6.99971	2	2	1	5	High
1-Octadecanamine, N,N-dimethyl-	124-28-7	7026	FF		0.213925	213.925	1.48623	2	2	1	5	High
Carbon dioxide	124-38-9	7028	FF FB		0.136941	136.941	0.455256	1	2	1	4	High
2-Amino-2-methylpropan-1-ol	124-68-5	7032	FF		0.0404732	40.4732	1.32987	2	2	1	5	High
Potassium acetate	127-08-2	7043	FF		0.18331	183.31	1.24969	1	2	1	4	High
Sodium acetate	127-09-3	7044	FF		0.18331	183.31	1.24969	1	2	1	4	High
Sodium N-methyl-N-oleoyltaurate	137-20-2	7067	FF		0.0390997	39.0997	1.99717	2	2	1	5	High
Ethylenediaminetetraacetic acid, disodium salt	139-33-3	7073	FF		0.432801	432.801	3.12815	0	2	1	3	Medium
Glycine, N-[2-[bis(carboxymethyl)amino]ethyl]-N-(2-hydroxyethyl)-, trisodium sa	139-89-9	7075	FF		0.48207	482.07	3.8572	0	2	1	3	Medium
Sodium formate	141-53-7	7090	FF		0.124897	124.897	1.10546	1	1	1	3	Medium
Ethyl acetoacetate	141-97-9	7092	FF		0.204973	204.973	3.40425	2	2	1	5	High
D-Gluconic acid	526-95-4	7169	FF		0.237469	237.469	2.80561	2	2	1	5	High
Sodium D-gluconate	527-07-1	7170	FF		0.237469	237.469	2.80561	2	2	1	5	High
N,N-Dimethylmethanamine hydrochloride	593-81-7	7229	FF		0.0254763	25.4763	0.424513	1	2	1	4	High
Pentyl acetate	628-63-7	7263	FF		0.719514	719.514	6.65837	2	2	1	5	High
Tridecane	629-50-5	7266	FF		0.778324	778.324	7.35155	2	2	1	5	High
Tetradecane	629-59-4	7267	FF		0.792564	792.564	8.41843	2	2	1	5	High
1-Hexadecene	629-73-2	7269	FF		0.313251	313.251	3.82663	2	2	1	5	High
Sodium hydroxymethanesulfonate	870-72-4	7328	FF		0.108736	108.736	2.12795	2	2	1	5	High
1-Tetradecene	1120-36-1	7367	FF		0.306098	306.098	2.95699	2	2	1	5	High
Sorbitan, monooctadecanoate	1338-41-6	7396	FF		0.13948	139.48	14.0586	2	2	1	5	High
Sorbitan, mono-(9Z)-9-octadecenoate	1338-43-8	7397	FF		0.054014	54.014	9.3797	1	2	1	4	High
Ammonium dodecyl sulfate	2235-54-3	7462	FF		0.507736	507.736	5.83144	2	2	1	5	High
Butanedioic acid, sulfo-, 1,4-bis(1,3-dimethylbutyl) ester, sodium salt	2373-38-8	7465	FF		0.0351001	35.1001	2.24471	2	2	1	5	High
D-Glucopyranoside, methyl	3149-68-6	7523	FF		0.0212338	21.2338	3.94648	2	2	1	5	High
1-Propanaminium, 3-chloro-2-hydroxy-N,N,N-trimethyl-, chloride	3327-22-8	7534	FF		0.00984347	9.84347	1.48776	2	2	1	5	High
Sodium chloroacetate	3926-62-3	7550	FF		0.0453417	45.3417	0.266429	2	2	1	5	High
Glycine, N,N-bis(carboxymethyl)-, trisodium salt	5064-31-3	7587	FF		0.103048	103.048	1.22923	2	2	1	5	High
1-Butoxy-2-propanol	5131-66-8	7589	FF		0.56338	563.38	4.9803	2	2	1	5	High
Sodium 1-octanesulfonate	5324-84-5	7595	FF		0.554729	554.729	3.01862	2	2	1	5	High
3-Methoxypropylamine	5332-73-0	7596	FF		0.0523564	52.3564	2.63178	2	2	1	5	High
Acetic acid, mercapto-, monoammonium salt	5421-46-5	7599	FF		0.148996	148.996	1.13821	2	2	1	5	High
Aminotrimethylene phosphonic acid	6419-19-8	7624	FF		0.12494	124.94	1.92328	2	2	1	5	High
Dimethyldiallylammonium chloride	7398-69-8	7650	FF		0.00993167	9.93167	1.71501	2	2	1	5	High
Sorbitan sesquioleate	8007-43-0	7682	FF		0.0357688	35.7688	30.3463	0	2	1	3	Medium
2-Acrylamido-2-methyl-1-propanesulfonic acid	15214-89-8	7770	FF		0.00845124	8.45124	0.950708	2	2	1	5	High
Phosphonic acid, [[(phosphonomethyl)imino]bis[2,1-ethanediylnitrilobis(methylen	15827-60-8	7775	FF		2.17211	2172.11	6.02007	1	2	1	4	High
2,4-Hexadienoic acid, potassium salt, (2E,4E)-	24634-61-5	7835	FF		0.0711952	71.1952	1.14095	2	2	1	5	High
Diethylbenzene	25340-17-4	7866	FF		0.479181	479.181	4.02981	2	2	1	5	High
Calcium dodecylbenzene sulfonate	26264-06-2	7891	FF		0.818954	818.954	5.29429	2	2	1	5	High
Sorbitan, tri-(9Z)-9-octadecenoate	26266-58-0	7892	FF		0.0108591	10.8591	68.9102	0	2	1	3	Medium
Dodecylbenzenesulfonic acid	27176-87-0	7923	FF	Yes	0.818954	818.954	5.29429	2	2	1	5	High
Benzenesulfonic acid, (1-methylethyl)-, sodium salt	28348-53-0	7941	FF		0.231818	231.818	2.36974	2	2	1	5	High
Disodium dodecyl(sulphonatophenoxy)benzenesulphonate	28519-02-0	7944	FF		1.59377	1593.77	3.64286	1	2	1	4	High
Propanol, 1(or 2)-(2-methoxymethylethoxy)-	34590-94-8	7983	FF		0.318835	318.835	6.76286	2	2	1	5	High
Benzenesulfonic acid, (1-methylethyl)-, ammonium salt	37475-88-0	7995	FF		0.231818	231.818	2.36974	2	2	1	5	High
2-Phosphono-1,2,4-butanetricarboxylic acid	37971-36-1	7999	FF		0.114303	114.303	2.06975	2	2	1	5	High
Ethanaminium, N,N,N-trimethyl-2-[(1-oxo-2-propenyl)oxy]-, chloride	44992-01-0	8016	FF		0.0151567	15.1567	4.26672	2	2	1	5	High
Fatty acids, C18-unsatd., dimers	61788-89-4	8062	FF		0.324719	324.719	34.9573	0	2	1	3	Medium
Alkenes, C>10 .alpha.-	64743-02-8	8257	FF		0.314956	314.956	4.32665	2	2	1	5	High
Phosphonic acid, (1-hydroxyethylidene)bis-, potassium salt	67953-76-8	8353	FF		0.328357	328.357	3.63812	2	2	1	5	High
Tetradecyldimethylbenzylammonium chloride	139-08-2	8460	FF		0.450772	450.772	7.83327	2	2	1	5	High
Alcohols, C11-14-iso-, C13-rich	68526-86-3	8687	FF		0.557805	557.805	5.45819	2	2	1	5	High
Alkanes, C12-14-iso-	68551-19-9	8714	FF		0.565237	565.237	3.52206	2	2	1	5	High
Alkanes, C13-16-iso-	68551-20-2	8715	FF		0.583157	583.157	4.59501	2	2	1	5	High
Benzenesulfonic acid, C10-16-alkyl derivs., compds. with triethanolamine	68584-25-8	8724	FF		0.808269	808.269	5.876	2	2	1	5	High
Benzene, C10-16-alkyl derivs.	68648-87-3	8786	FF		2.0385	2038.5	7.87278	2	2	1	5	High
1-(Phenylmethyl)pyridinium Et Me derivs., chlorides	68909-18-2	8833	FF		0.0373798	37.3798	0.41962	2	2	1	5	High
Sulfuric acid, mono-C12-18-alkyl esters, sodium salts	68955-19-1	8918	FF		0.498214	498.214	8.13745	2	2	1	5	High
Poly(oxy-1,2-ethanediyl), .alpha.-(octylphenyl)-.omega.-hydroxy-, branched	68987-90-6	8944	FF		0.448877	448.877	5.08447	2	2	1	5	High
C10-16-Alkyldimethylamines oxides	70592-80-2	8992	FF		0.214458	214.458	3.50855	2	2	1	5	High
Acetic acid, C6-8-branched alkyl esters	90438-79-2	9065	FF		0.561719	561.719	6.40062	2	2	1	5	High
Ethyl lactate	97-64-3	9127	FF		0.116251	116.251	4.19709	2	2	1	5	High
2,6,8-Trimethyl-4-nonanol	123-17-1	9159	FF		0.0624015	62.4015	3.5136	2	2	1	5	High
Isovaleric acid	503-74-2	9182	FB		0.132548	132.548	1.421	2	2	1	5	High
[Nitrilotris(methylene)]tris-phosphonic acid pentasodium salt	2235-43-0	9232	FF		0.12494	124.94	1.92328	2	2	1	5	High
1-Eicosene	3452-07-1	9257	FF		0.31399	313.99	6.13412	2	2	1	5	High
Acetonitrile, 2,2',2''-nitrilotris-	7327-60-8	9285	FF		0.0362552	36.2552	0.27508	2	2	1	5	High
Phosphonic acid, [[(phosphonomethyl)imino]bis[2,1-ethanediylnitrilobis(methylen	22042-96-2	9321	FF		2.17211	2172.11	6.02007	1	2	1	4	High
Tripropylene glycol monomethyl ether	25498-49-1	9329	FF		0.10189	101.89	6.78037	2	2	1	5	High
2-(Hydroxymethylamino)ethanol	34375-28-5	9357	FF		0.0360605	36.0605	0.429726	2	2	1	5	High
Phosphonic acid, [[(phosphonomethyl)imino]bis[6,1-hexanediylnitrilobis(methylen	34690-00-1	9358	FF		2.63172	2631.72	7.78307	0	2	1	3	Medium
Ethanol, 2,2',2''-nitrilotris-, tris(dihydrogen phosphate) (ester), sodium salt	68171-29-9	9418	FF		0.499388	499.388	2.5366	2	2	1	5	High
Isooctanol	26952-21-6	9457	FF		0.410455	410.455	3.39383	2	2	1	5	High
Sodium carbonate	497-19-8	9621	FF		0.136804	136.804	1.09219	2	2	1	5	High
Formic acid, potassium salt	590-29-4	9626	FF		0.124897	124.897	1.10546	1	1	1	3	Medium
Thiocyanic acid, ammonium salt	1762-95-4	9653	FF		0.132245	132.245	0.277416	1	1	1	3	Medium
Phosphonic acid, (1-hydroxyethylidene)bis-, tetrasodium salt	3794-83-0	9663	FF		0.328357	328.357	3.63812	2	2	1	5	High
Benzenesulfonic acid, mono-C10-16-alkyl derivs., sodium salts	68081-81-2	9754	FF		0.828248	828.248	4.76135	2	2	1	5	High
1,6-Hexanediamine dihydrochloride	6055-52-3	9991	FF		0.280153	280.153	0.888083	2	2	1	5	High
Camphor	76-22-2	10955	FF		0.0327881	32.7881	1.69097	2	2	1	5	High
D&C Red 28	18472-87-2	11090	FF		0.0129791	12.9791	0.181306	2	2	1	5	High
Methoxyacetic acid	625-45-6	11591	FF		0.066593	66.593	1.93484	2	2	1	5	High
4,4-Dimethyloxazolidine	51200-87-4	12314	FF		0.0223402	22.3402	3.58495	2	2	1	5	High
2,2-Dibromo-3-nitrilopropionamide	10222-01-2	12361	FF		0.0523796	52.3796	0.760838	2	2	1	5	High
Phorate	298-02-2	12459	FB	Yes	0.0856944	85.6944	0.0112807	2	2	0	4	High
1,2-Benzisothiazolin-3-one	2634-33-5	12523	FF		0.652037	652.037	2.51799	2	2	1	5	High
Didecyldimethylammonium chloride	7173-51-5	12537	FF	Yes	0.163107	163.107	16.5112	2	2	1	5	High
2-(Thiocyanomethylthio)benzothiazole	21564-17-0	12647	FF	Yes	0.0745243	74.5243	0.0894115	2	2	1	5	High
Hydroxyvalerenic acid	1619-16-5	13564	FF		0.00946311	9.46311	0.688654	2	2	1	5	High
2-Methyl-3(2H)-isothiazolone	2682-20-4	14259	FF		0.0203618	20.3618	1.23858	2	2	1	5	High
5-Chloro-2-methyl-3(2H)-isothiazolone	26172-55-4	14286	FF		0.00954694	9.54694	0.670881	2	2	1	5	High
Benzyldimethyldodecylammonium chloride	139-07-1	14317	FF		0.460925	460.925	6.33374	2	2	1	5	High
Alkyl* dimethyl ethylbenzyl ammonium chloride *(50%C12, 30%C14, 17%C16, 3%C18)	85409-23-0_1	14320	FF		0.205076	205.076	12.0148	2	2	1	5	High
Alkyl* dimethyl ethylbenzyl ammonium chloride *(60%C14, 30%C16, 5%C12, 5%C18)	68956-79-6	14321	FF		0.199132	199.132	14.7536	2	2	1	5	High
L-Lactic acid	79-33-4	14689	FF		0.157264	157.264	1.81295	2	2	1	5	High
Sodium diacetate	126-96-5	14909	FF		0.18331	183.31	1.24969	1	2	1	4	High
Sodium trichloroacetate	650-51-1	14924	FF		0.0479058	47.9058	1.17753	2	2	1	5	High
Tributyltetradecylphosphonium chloride	81741-28-8	14997	FF		0.33852	338.52	34.8517	1	2	1	4	High
Quaternary ammonium compounds, di-C8-10-alkyldimethyl, chlorides	68424-95-3	15491	FF		0.16847	168.47	10.6644	2	2	1	5	High
Ammonium hydrogen carbonate	1066-33-7	15618	FF		0.136804	136.804	1.09219	2	2	1	5	High
3,5,7-Triazatricyclo(3.3.1.1(superscript 3,7))decane, 1-(3-chloro-2-propenyl)-,	51229-78-8	15748	FF		0.00149449	1.49449	0.563933	2	2	1	5	High
Glycine, N-(hydroxymethyl)-, monosodium salt	70161-44-3	15799	FF		0.0729007	72.9007	2.03856	2	2	1	5	High
Sodium octyl sulfate	142-31-4	16226	FF		0.49984	499.84	3.58988	2	2	1	5	High
Sodium decyl sulfate	142-87-0	16229	FF		0.507308	507.308	4.60761	2	2	1	5	High
Carbonic acid, dipotassium salt	584-08-7	16245	FF		0.136804	136.804	1.09219	2	2	1	5	High
2,2'-(Octadecylimino)diethanol	10213-78-2	16311	FF		0.509403	509.403	9.02868	1	2	1	4	High
Ethanol, 2-[2-[2-(tridecyloxy)ethoxy]ethoxy]-, hydrogen sulfate, sodium salt	25446-78-0	16457	FF		1.12605	1126.05	8.66389	1	1	1	3	Medium
Hexadecyltrimethylammonium bromide	57-09-0	17028	FF		0.16744	167.44	11.895	2	2	1	5	High
Endosulfan I	959-98-8	17539	FB		0.00226997	2.26997	0.0963011	2	2	1	5	High
Endosulfan II	33213-65-9	17540	FB		0.00226997	2.26997	0.0963011	2	2	1	5	High
Ethyl benzoate	93-89-0	18696	FF		0.281215	281.215	5.10138	2	2	1	5	High
Quinaldine	91-63-4	20271	FF		0.0363927	36.3927	1.60997	2	2	1	5	High
Thiamine hydrochloride	67-03-8	20622	FF		0.0160181	16.0181	1.3228	2	2	1	5	High
Triethyl citrate	77-93-0	20701	FF		0.081251	81.251	3.49774	2	2	1	5	High
2-Butoxy-1-propanol	15821-83-7	21399	FF		0.566317	566.317	6.18409	2	2	1	5	High
3,4,4-Trimethyloxazolidine	75673-43-7	21465	FF		0.0148604	14.8604	2.87154	2	2	1	5	High
Alcohols, C12-16, ethoxylated	68551-12-2	21588	FF		1.06119	1061.19	8.1986	2	2	1	5	High
Pentyl butyrate	540-18-1	21604	FF		0.690617	690.617	7.02015	2	2	1	5	High
2-Ethylhexyl benzoate	5444-75-7	21654	FF		1.74678	1746.78	8.35819	2	2	1	5	High
Benzylhexadecyldimethylammonium chloride	122-18-9	21665	FF		0.437706	437.706	9.61889	2	2	1	5	High
Bicine	150-25-4	21669	FF		0.154585	154.585	1.16237	0	2	1	3	Medium
C.I. Acid violet 12, disodium salt	6625-46-3	21715	FF		0.450624	450.624	1.72485	2	2	1	5	High
Diisopropylnaphthalene	38640-62-9	21869	FF		0.0681389	68.1389	2.19603	2	2	1	5	High
Alcohols, C12-13, ethoxylated	66455-14-9	21929	FF		1.05255	1052.55	7.23119	2	2	1	5	High
Alcohols, C14-15, ethoxylated	68951-67-7	21934	FF		1.06695	1066.95	10.4237	2	2	1	5	High
Alcohols, C6-12, ethoxylated	68439-45-2	21941	FF		0.998301	998.301	4.82276	2	2	1	5	High
Alcohols, C10-12, ethoxylated	67254-71-1	21942	FF		1.0395	1039.5	6.35063	2	2	1	5	High
Alcohols, C9-11, ethoxylated	68439-46-3	21944	FF		1.02159	1021.59	5.54997	2	2	1	5	High
Alcohols, C12-14, ethoxylated propoxylated	68439-51-0	21947	FF		1.44991	1449.91	11.6654	2	2	1	5	High
Gluconic acid	133-42-6	22000	FF		0.237469	237.469	2.80561	2	2	1	5	High
Glycine, N-(carboxymethyl)-N-(2-hydroxyethyl)-, disodium salt	135-37-5	22008	FF		0.138627	138.627	1.04908	0	2	1	3	Medium
N,N'-Dibutylthiourea	109-46-6	22187	FF		0.101261	101.261	0.552423	2	2	1	5	High
N,N-Dimethyldecylamine oxide	2605-79-0	22190	FF		0.209339	209.339	2.40837	2	2	1	5	High
Butyl lactate	138-22-7	22196	FF		0.268215	268.215	4.04292	2	2	1	5	High
1-Dodecyl-2-pyrrolidinone	2687-96-9	22206	FF		0.317982	317.982	4.43111	2	2	1	5	High
N-Oleyl diethanolamide	13127-82-7	22213	FF		0.197071	197.071	6.01747	2	2	1	5	High
Propylbenzene	103-65-1	22219	FB		0.38786	387.86	2.47551	2	2	1	5	High
Rhodamine B	81-88-9	22369	FF		0.0397244	39.7244	1.24076	2	2	1	5	High
Tripotassium citrate monohydrate	6100-05-6	22501	FF		0.0557861	55.7861	0.926042	2	2	1	5	High
C10-C16 ethoxylated alcohol	68002-97-1	23993	FF		1.44178	1441.78	11.1381	2	2	1	5	High
D&C Red No. 33	3567-66-6	24562	FF		0.198479	198.479	0.527349	2	2	1	5	High
Acetyltriethyl citrate	77-89-4	24576	FF		0.128205	128.205	4.12308	2	2	1	5	High
1-Benzylquinolinium chloride	15619-48-4	24593	FF		0.013657	13.657	0.658163	2	2	1	5	High
C.I. Acid Red 1	3734-67-6	24663	FF		0.572343	572.343	1.23793	2	2	1	5	High
4-Ethyloct-1-yn-3-ol	5877-42-9	24697	FF		0.292509	292.509	2.61056	2	2	1	5	High
2,2'-[Ethane-1,2-diylbis(oxy)]diethanamine	929-59-9	24742	FF		0.512518	512.518	1.59612	2	2	1	5	High
Benzenesulfonic acid, (1-methylethyl)-,	37953-05-2	24932	FF		0.179521	179.521	2.4772	2	2	1	5	High
D-Lactic acid	10326-41-7	27030	FF		0.157264	157.264	1.81295	2	2	1	5	High
Glycolic acid sodium salt	2836-32-0	27153	FF		0.0772748	77.2748	1.17281	2	2	1	5	High
Butyryl trihexyl citrate	82469-79-2	27535	FF		0.295952	295.952	7.50416	1	2	1	4	High
Isoquinoline	119-65-3	27644	FF		0.0506053	50.6053	0.598887	2	2	1	5	High
4-Methoxybenzyl formate	122-91-8	27649	FF		0.0288965	28.8965	3.8477	2	2	1	5	High
Endrin aldehyde	7421-93-4	27727	FB		0.00409398	4.09398	0.937315	2	2	1	5	High
Methylcyclohexane	108-87-2	27733	FF		0.22074	220.74	2.38022	2	2	1	5	High
1,2,3-Trimethylbenzene	526-73-8	27750	FF		0.102542	102.542	1.25339	2	2	1	5	High
1-(Alkyl* amino)-3-aminopropane *(42%C12, 26%C18, 15%C14, 8%C16, 5%C10, 4%C8)	68155-37-3	28032	FF		0.555407	555.407	2.62246	2	2	1	5	High
1-(1-Naphthylmethyl)quinolinium chloride	65322-65-8	29394	FF		0.00834028	8.34028	1.36528	2	2	1	5	High
Trisodium citrate dihydrate	6132-04-3	29397	FF		0.0557861	55.7861	0.926042	2	2	1	5	High
2,2'-(diazene-1,2-diyldiethane-1,1-diyl)bis-4,5-dihydro-1H-imidazole dihydrochl	27776-21-2	29404	FF		0.101479	101.479	0.145258	2	2	1	5	High
2,2-Dibromopropanediamide	73003-80-2	29405	FF		0.0824697	82.4697	1.61321	2	2	1	5	High
2-Bromo-3-nitrilopropionamide	1113-55-9	29409	FF		0.071788	71.788	0.381075	2	2	1	5	High
2-Methylquinoline hydrochloride	62763-89-7	29413	FF		0.0363927	36.3927	1.60997	2	2	1	5	High
C.I. Pigment Red 5	6410-41-9	29415	FF		0.0277311	27.7311	2.92508	2	2	1	5	High
C.I. Solvent Red 26	4477-79-6	29416	FF		0.0983238	98.3238	0.73466	2	2	1	5	High
2-Phosphonobutane-1,2,4-tricarboxylic acid, potassium salt (1:x)	93858-78-7	29417	FF		0.114303	114.303	2.06975	2	2	1	5	High
2-Propenoic acid, 2-(2-hydroxyethoxy)ethyl ester	13533-05-6	29418	FF		0.143798	143.798	1.30587	2	2	1	5	High
Alcohols, C12-14-secondary	126950-60-5	29431	FF		0.37401	374.01	4.0427	2	2	1	5	High
Alcohols, C9-11-iso-, C10-rich, ethoxylated	78330-20-8	29434	FF		0.308621	308.621	3.40382	2	2	1	5	High
(13Z)-N,N-bis(2-hydroxyethyl)-N-methyldocos-13-en-1-aminium chloride	120086-58-0	29436	FF		0.119114	119.114	55.9591	1	2	1	4	High
2-Hydroxyethylammonium hydrogen sulphite	13427-63-9	29449	FF		0.0449469	44.9469	0.769622	2	2	1	5	High
Ammonium citrate (1:1)	7632-50-0	29463	FF		0.0557861	55.7861	0.926042	2	2	1	5	High
1-Ethyl-2-methylbenzene	611-14-3	29477	FF		0.193058	193.058	0.911323	2	2	1	5	High
Benzenesulfonic acid, C10-16-alkyl derivs., potassium salts	68584-27-0	29481	FF		0.808269	808.269	5.876	2	2	1	5	High
Bis(1-methylethyl)naphthalenesulfonic acid, cyclohexylamine salt	68425-61-6	29485	FF		0.104622	104.622	2.28936	2	2	1	5	High
3-Hydroxybutanal	107-89-1	29490	FF		0.0653072	65.3072	1.74779	2	2	1	5	High
Sodium bis(tridecyl) sulfobutanedioate	2673-22-5	29491	FF		0.311318	311.318	11.6121	1	1	1	3	Medium
C12-14 tert-alkyl ethoxylated amines	73138-27-9	29493	FF		0.441365	441.365	5.53841	2	2	1	5	High
1,2-Ethanediaminium, N,N'-bis[2-[bis(2-hydroxyethyl)methylammonio]ethyl]-N,N'-b	138879-94-4	29510	FF		0.408764	408.764	365.022	0	2	1	3	Medium
Decyldimethylamine	1120-24-7	29525	FF		0.207243	207.243	0.56302	2	2	1	5	High
Di-sec-butylphenol	31291-60-8	29533	FF		0.073945	73.945	0.736723	2	2	1	5	High
Disodium ethylenediaminediacetate	38011-25-5	29534	FF		0.475314	475.314	2.41632	0	2	1	3	Medium
Disodium ethylenediaminetetraacetate dihydrate	6381-92-6	29535	FF		0.432801	432.801	3.12815	0	2	1	3	Medium
Dodecylbenzenesulfonic acid, monoethanolamine salt	26836-07-7	29540	FF		0.818954	818.954	5.30115	2	2	1	5	High
Benzamorf	12068-08-5	29541	FF		0.818954	818.954	5.30115	2	2	1	5	High
Benzenesulfonic acid, dodecyl-, branched, compds. with 2-propanamine	90218-35-2	29542	FF		0.160834	160.834	2.49755	2	2	1	5	High
Alcohols, C7-9-iso-, C8-rich, ethoxylated	78330-19-5	29548	FF		0.620353	620.353	5.58612	2	2	1	5	High
2-Aminoethanol hydrochloride	2002-24-6	29552	FF		0.0449469	44.9469	0.769622	2	2	1	5	High
N-Methyl-N-hydroxyethyl-N-hydroxyethoxyethylamine	68213-98-9	29553	FF		0.209655	209.655	2.22588	2	2	1	5	High
Alcohols, C11-14-iso-, C13-rich, ethoxylated	78330-21-9	29560	FF		0.660147	660.147	10.8922	2	2	1	5	High
Sodium sesquicarbonate	533-96-0	29605	FF		0.136804	136.804	1.09219	2	2	1	5	High
Isoquinolinium, 2-(phenylmethyl)-, chloride	35674-56-7	29610	FF		0.01745	17.45	0.686157	2	2	1	5	High
L-Dilactide	4511-42-6	29614	FF		0.0327814	32.7814	1.12337	2	2	1	5	High
N,N-Dimethyl-methanamine-N-oxide	1184-78-7	29637	FF		0.0359839	35.9839	1.17279	2	2	1	5	High
N-(2-Acryloyloxyethyl)-N-benzyl-N,N-dimethylammonium chloride	46830-22-2	29638	FF		0.068177	68.177	4.65436	2	2	1	5	High
N,N-dimethyloctadecylamine hydrochloride	1613-17-8	29639	FF		0.213925	213.925	1.48623	2	2	1	5	High
2-Ethoxynaphthalene	93-18-5	29643	FF		0.0658777	65.8777	3.12558	2	2	1	5	High
Naphthalenesulfonic acid, bis(1-methylethyl)-	28757-00-8	29644	FF		0.104622	104.622	3.70955	2	2	1	5	High
Naphthalenesulphonic acid, bis (1-methylethyl)-methyl derivatives	99811-86-6	29646	FF		0.0623543	62.3543	0.947433	2	2	1	5	High
Naphthenic acid ethoxylate	68410-62-8	29647	FF		0.0337254	33.7254	5.58909	2	2	1	5	High
Nitrilotriacetamide	4862-18-4	29648	FF		0.115935	115.935	1.97104	2	2	1	5	High
Phosphonic acid, (((2-[(2-hydroxyethyl)(phosphonomethyl)amino)ethyl)imino]bis(m	129828-36-0	29675	FF		0.688448	688.448	4.21912	2	2	1	5	High
Phosphonic acid (dimethylamino(methylene))	29712-30-9	29676	FF		0.0933127	93.3127	0.757919	2	2	1	5	High
Phosphonic acid, [[(phosphonomethyl)imino]bis[2,1-ethanediylnitrilobis(methylen	70714-66-8	29678	FF		2.17211	2172.11	6.02007	1	2	1	4	High
2,2'-Azobis(2-amidinopropane) dihydrochloride	2997-92-4	29715	FF		0.118029	118.029	0.509074	2	2	1	5	High
Propylene pentamer	15220-87-8	29716	FF		0.0285835	28.5835	2.57579	2	2	1	5	High
N,N,N-Trimethyl-3-((1-oxooctadecyl)amino)-1-propanaminium methyl sulfate	19277-88-4	29720	FF		0.165999	165.999	51.6875	2	2	1	5	High
Sodium caprylamphopropionate	68610-44-6	29736	FF		0.343937	343.937	2.88072	2	2	1	5	High
4-[Abieta-8,11,13-trien-18-yl(3-oxo-3-phenylpropyl)amino]butan-2-one hydrochlor	143106-84-7	29751	FF		0.0380399	38.0399	0.160707	2	2	1	5	High
Triethanolamine hydroxyacetate	68299-02-5	29764	FF		0.224192	224.192	11.4908	2	2	1	5	High
Trisodium ethylenediaminetriacetate	19019-43-3	29768	FF		0.252464	252.464	1.07213	0	2	1	3	Medium
Acetic acid, hydroxy-, reaction products with triethanolamine	68442-62-6	29800	FF		0.216954	216.954	3.70367	2	2	1	5	High
Isoquinoline, reaction products with benzyl chloride and quinoline	68909-80-8	29801	FF		0.0506053	50.6053	0.598887	2	2	1	5	High
Isopropanolamine dodecylbenzene	42504-46-1	29813	FF		2.03817	2038.17	6.99971	2	2	1	5	High
Lauryl hydroxysultaine	13197-76-7	29825	FF		0.233435	233.435	3.41418	2	2	1	5	High
Sodium C14-16 alpha-olefin sulfonate	68439-57-6	29834	FF		0.128516	128.516	2.85449	2	2	1	5	High
Trimethanolamine	14002-32-5	29836	FF		0.0744452	74.4452	7.97741	2	2	1	5	High
Ammonium acrylate	10604-69-0	29842	FF		0.0467504	46.7504	0.513802	2	2	1	5	High
Acrylic acid, with sodium-2-acrylamido-2-methyl-1-propanesulfonate and sodium p	110224-99-2	29843	FF		0.00845124	8.45124	0.950708	2	2	1	5	High
Pyrimidine	289-95-2	29850	FF		0.0916745	91.6745	0.405099	2	2	1	5	High
2-Dodecylbenzenesulfonic acid- n-(2-aminoethyl)ethane-1,2-diamine(1:1)	40139-72-8	29852	FF		0.897786	897.786	18.4566	1	2	1	4	High
1-Propanesulfonic acid	5284-66-2	29853	FF		0.100997	100.997	1.89576	2	2	1	5	High
Methylenebis(5-methyloxazolidine)	66204-44-2	29856	FF		0.0119905	11.9905	8.35083	2	2	1	5	High
Morpholinium, 4-ethyl-4-hexadecyl-, ethyl sulfate	78-21-7	29867	FF		0.0679502	67.9502	19.6809	2	2	1	5	High
Choline bicarbonate	78-73-9	29868	FF		0.0208219	20.8219	4.33944	2	2	1	5	High
Sodium maleate (1:x)	18016-19-8	29879	FF		0.115652	115.652	1.35231	2	2	1	5	High
1-Octadecanamine, acetate (1:1)	2190-04-7	29880	FF		0.296796	296.796	2.22964	2	2	1	5	High
Sulfuric acid, mono-C6-10-alkyl esters, ammonium salts	68187-17-7	29882	FF		0.49984	499.84	3.58988	2	2	1	5	High
Benzenesulfonic acid, C10-16-alkyl derivs., compds. with cyclohexylamine	255043-08-4	29888	FF		0.818954	818.954	5.29429	2	2	1	5	High
Triethanolamine hydrochloride	637-39-8	30893	FF		0.216954	216.954	3.70367	2	2	1	5	High
(2,3-dihydroxypropyl)trimethylammonium chloride	34004-36-9	31353	FF		0.0247283	24.7283	7.09185	2	2	1	5	High
Galantamine hydrobromide	69353-21-5	31354	FF		0.00209752	2.09752	0.40689	1	2	1	4	High
Benactyzine hydrochloride	57-37-4	31355	FF		0.0444137	44.4137	1.24307	2	2	1	5	High
4,6-Dimethyl-2-heptanone	19549-80-5	31358	FF		0.0961513	96.1513	1.33918	2	2	1	5	High
1,3,5-Triazine	290-87-9	31361	FF		0.0890751	89.0751	0.67825	2	2	1	5	High
2-Hydroxy-N,N-bis(2-hydroxyethyl)-N-methylethanaminium chloride	7006-59-9	31363	FF		0.176782	176.782	28.7954	2	2	1	5	High
alpha-Lactose monohydrate	5989-81-1	31367	FF		0.0925673	92.5673	13.0762	2	2	1	5	High
Sodium dl-lactate	72-17-3	31368	FF		0.157264	157.264	1.81295	2	2	1	5	High
Sodium l-lactate	867-56-1	31369	FF		0.157264	157.264	1.81295	2	2	1	5	High
Ammonium lactate	515-98-0	31372	FF		0.157264	157.264	1.81295	2	2	1	5	High

## Sheet: TOPKAT ranked chemicals
Overall Rank Order	Chemical Name	CASRN	DSSTox_CID	Fracturing Fluid (FF) or Flowback/Produced Water (FB)	TOPKAT_Chronic_LOAEL (g/kg bw)	TOPKAT_Chronic_LOAEL (mg/kg bw)	Confidence Classification
1	N-(3-Chloroallyl)hexaminium chloride	4080-31-3	4760	FF	0.00149449	1.49449	High
2	3,5,7-Triazatricyclo(3.3.1.1(superscript 3,7))decane, 1-(3-chloro-2-propenyl)-,	51229-78-8	15748	FF	0.00149449	1.49449	High
3	Galantamine hydrobromide	69353-21-5	31354	FF	0.00209752	2.09752	High
4	Endosulfan I	959-98-8	17539	FB	0.00226997	2.26997	High
5	Endosulfan II	33213-65-9	17540	FB	0.00226997	2.26997	High
6	Endrin aldehyde	7421-93-4	27727	FB	0.00409398	4.09398	High
7	1-(1-Naphthylmethyl)quinolinium chloride	65322-65-8	29394	FF	0.00834028	8.34028	High
8	2-Acrylamido-2-methyl-1-propanesulfonic acid	15214-89-8	7770	FF	0.00845124	8.45124	High
9	Acrylic acid, with sodium-2-acrylamido-2-methyl-1-propanesulfonate and sodium p	110224-99-2	29843	FF	0.00845124	8.45124	High
10	Hydroxyvalerenic acid	1619-16-5	13564	FF	0.00946311	9.46311	High
11	5-Chloro-2-methyl-3(2H)-isothiazolone	26172-55-4	14286	FF	0.00954694	9.54694	High
12	1-Propanaminium, 3-chloro-2-hydroxy-N,N,N-trimethyl-, chloride	3327-22-8	7534	FF	0.00984347	9.84347	High
13	Dimethyldiallylammonium chloride	7398-69-8	7650	FF	0.00993167	9.93167	High
14	Dazomet	533-74-4	4902	FF	0.0105684	10.5684	High
15	Sorbitan, tri-(9Z)-9-octadecenoate	26266-58-0	7892	FF	0.0108591	10.8591	Medium
16	Methylenebis(5-methyloxazolidine)	66204-44-2	29856	FF	0.0119905	11.9905	High
17	Methenamine	100-97-0	692	FF	0.0123277	12.3277	High
18	D&C Red 28	18472-87-2	11090	FF	0.0129791	12.9791	High
19	1-Benzylquinolinium chloride	15619-48-4	24593	FF	0.013657	13.657	High
20	3,4,4-Trimethyloxazolidine	75673-43-7	21465	FF	0.0148604	14.8604	High
21	Ethanaminium, N,N,N-trimethyl-2-[(1-oxo-2-propenyl)oxy]-, chloride	44992-01-0	8016	FF	0.0151567	15.1567	High
22	Thiamine hydrochloride	67-03-8	20622	FF	0.0160181	16.0181	High
23	Sodium dichloroisocyanurate	2893-78-9	4994	FF	0.0164317	16.4317	High
24	Sodium erythorbate (1:1)	6381-77-7	570	FF	0.0170226	17.0226	High
25	Isoascorbic acid	89-65-6	6537	FF	0.0170226	17.0226	High
26	Isoquinolinium, 2-(phenylmethyl)-, chloride	35674-56-7	29610	FF	0.01745	17.45	High
27	alpha-Terpineol	98-55-5	6625	FF	0.0177203	17.7203	High
28	Propylene carbonate	108-32-7	6789	FF	0.0198131	19.8131	High
29	2-Methyl-3(2H)-isothiazolone	2682-20-4	14259	FF	0.0203618	20.3618	High
30	Choline chloride	67-48-1	325	FF	0.0208219	20.8219	High
31	Choline bicarbonate	78-73-9	29868	FF	0.0208219	20.8219	High
32	Butene	25167-67-3	6746	FF	0.0211588	21.1588	High
33	D-Glucopyranoside, methyl	3149-68-6	7523	FF	0.0212338	21.2338	High
34	Bronopol	52-51-7	4652	FF	0.0213513	21.3513	High
35	Methane	74-82-8	5545	FF	0.0213984	21.3984	Medium
36	Symclosene	87-90-1	6523	FF	0.0214206	21.4206	High
37	Anethole	104-46-1	86	FF	0.0216552	21.6552	High
38	Tetramethylammonium chloride	75-57-0	1749	FF	0.0216767	21.6767	High
39	Aroclor 1248	12672-29-6	769	FB	0.0218697	21.8697	High
40	2-Methyl-3-butyn-2-ol	115-19-5	1949	FF	0.0219331	21.9331	High
41	Ethyne	74-86-2	6379	FF	0.0222579	22.2579	Low
42	4,4-Dimethyloxazolidine	51200-87-4	12314	FF	0.0223402	22.3402	High
43	N,N'-Methylenebisacrylamide	110-26-9	5595	FF	0.0233576	23.3576	High
44	delta-Hexachlorocyclohexane	319-86-8	4134	FB	0.0238877	23.8877	High
45	(2,3-dihydroxypropyl)trimethylammonium chloride	34004-36-9	31353	FF	0.0247283	24.7283	High
46	Sulfan blue	129-17-9	6065	FF	0.025315	25.315	High
47	Trimethylamine	75-50-3	6238	FF	0.0254763	25.4763	High
48	N,N-Dimethylmethanamine hydrochloride	593-81-7	7229	FF	0.0254763	25.4763	High
49	C.I. Pigment Red 5	6410-41-9	29415	FF	0.0277311	27.7311	High
50	Propylene pentamer	15220-87-8	29716	FF	0.0285835	28.5835	High
51	4-Methoxybenzyl formate	122-91-8	27649	FF	0.0288965	28.8965	High
52	Benzo(g,h,i)perylene	191-24-2	3908	FB	0.0291386	29.1386	High
53	1-Propene	115-07-1	1205	FF	0.0291781	29.1781	High
54	Furfuryl alcohol	98-00-0	5347	FF	0.0319384	31.9384	High
55	D-Glucose	50-99-7	2910	FF	0.0319535	31.9535	High
56	Dimethylaminoethanol	108-01-0	505	FF	0.0319992	31.9992	High
57	Ethylene	74-85-1	5931	FF	0.0327737	32.7737	Medium
58	L-Dilactide	4511-42-6	29614	FF	0.0327814	32.7814	High
59	Camphor	76-22-2	10955	FF	0.0327881	32.7881	High
60	Chloromethane	74-87-3	1541	FB	0.0331902	33.1902	Medium
61	1-tert-Butoxy-2-propanol	57018-52-7	5967	FF	0.0334683	33.4683	High
62	Naphthenic acid ethoxylate	68410-62-8	29647	FF	0.0337254	33.7254	High
63	1-Amino-2-propanol	78-96-6	1764	FF	0.0348394	34.8394	High
64	2-Methyl-2,4-pentanediol	107-41-5	1885	FF	0.0350607	35.0607	High
65	Butanedioic acid, sulfo-, 1,4-bis(1,3-dimethylbutyl) ester, sodium salt	2373-38-8	7465	FF	0.0351001	35.1001	High
66	Sorbitan sesquioleate	8007-43-0	7682	FF	0.0357688	35.7688	Medium
67	N,N-Dimethyl-methanamine-N-oxide	1184-78-7	29637	FF	0.0359839	35.9839	High
68	2-(Hydroxymethylamino)ethanol	34375-28-5	9357	FF	0.0360605	36.0605	High
69	Acetonitrile, 2,2',2''-nitrilotris-	7327-60-8	9285	FF	0.0362552	36.2552	High
70	Quinaldine	91-63-4	20271	FF	0.0363927	36.3927	High
71	2-Methylquinoline hydrochloride	62763-89-7	29413	FF	0.0363927	36.3927	High
72	1-(Phenylmethyl)pyridinium Et Me derivs., chlorides	68909-18-2	8833	FF	0.0373798	37.3798	High
73	4-[Abieta-8,11,13-trien-18-yl(3-oxo-3-phenylpropyl)amino]butan-2-one hydrochlor	143106-84-7	29751	FF	0.0380399	38.0399	High
74	Sodium N-methyl-N-oleoyltaurate	137-20-2	7067	FF	0.0390997	39.0997	High
75	Indole	120-72-9	737	FF	0.0392805	39.2805	High
76	Rhodamine B	81-88-9	22369	FF	0.0397244	39.7244	High
77	2-Amino-2-methylpropan-1-ol	124-68-5	7032	FF	0.0404732	40.4732	High
78	Methyl vinyl ketone	78-94-4	5671	FF	0.0417726	41.7726	High
79	4-Methyl-2-pentanol	108-11-2	6781	FF	0.042811	42.811	High
80	2-Hydroxyethyl acrylate	818-61-1	2123	FF	0.0428791	42.8791	High
81	FD&C Blue no. 1	3844-45-9	189	FF	0.0432656	43.2656	High
82	Benactyzine hydrochloride	57-37-4	31355	FF	0.0444137	44.4137	High
83	Tromethamine	77-86-1	3723	FF	0.0448117	44.8117	High
84	Ethanolamine	141-43-5	2000	FF	0.0449469	44.9469	High
85	2-Hydroxyethylammonium hydrogen sulphite	13427-63-9	29449	FF	0.0449469	44.9469	High
86	2-Aminoethanol hydrochloride	2002-24-6	29552	FF	0.0449469	44.9469	High
87	Sodium chloroacetate	3926-62-3	7550	FF	0.0453417	45.3417	High
88	N-Methylethanolamine	109-83-1	5603	FF	0.0456131	45.6131	High
89	Ammonium acrylate	10604-69-0	29842	FF	0.0467504	46.7504	High
90	Isopropylamine	75-31-0	5682	FF	0.0467968	46.7968	High
91	Sodium trichloroacetate	650-51-1	14924	FF	0.0479058	47.9058	High
92	Pyrrole	109-97-7	1910	FF	0.0486797	48.6797	High
93	Isoquinoline	119-65-3	27644	FF	0.0506053	50.6053	High
94	Isoquinoline, reaction products with benzyl chloride and quinoline	68909-80-8	29801	FF	0.0506053	50.6053	High
95	Ethane	74-84-0	6377	FF	0.0510891	51.0891	Medium
96	1,2,3-Trichlorobenzene	87-61-6	6193	FB	0.0513262	51.3262	High
97	Cyclohexylamine sulfate	19834-02-7	362	FF	0.0521018	52.1018	High
98	3-Methoxypropylamine	5332-73-0	7596	FF	0.0523564	52.3564	High
99	2,2-Dibromo-3-nitrilopropionamide	10222-01-2	12361	FF	0.0523796	52.3796	High
100	Formamide	75-12-7	5337	FF	0.0538328	53.8328	Medium
101	Sorbitan, mono-(9Z)-9-octadecenoate	1338-43-8	7397	FF	0.054014	54.014	High
102	Ammonium citrate (2:1)	3012-65-5	79	FF	0.0557861	55.7861	High
103	Citric acid	77-92-9	332	FF	0.0557861	55.7861	High
104	Trisodium citrate	68-04-2	6363	FF	0.0557861	55.7861	High
105	Tripotassium citrate monohydrate	6100-05-6	22501	FF	0.0557861	55.7861	High
106	Trisodium citrate dihydrate	6132-04-3	29397	FF	0.0557861	55.7861	High
107	Ammonium citrate (1:1)	7632-50-0	29463	FF	0.0557861	55.7861	High
108	Propane	74-98-6	6386	FF	0.0560558	56.0558	High
109	Sucrose	57-50-1	1288	FF	0.0566014	56.6014	Low
110	Morpholine	110-91-8	5688	FF	0.0566832	56.6832	High
111	Triethyl phosphate	78-40-0	6228	FF	0.0569412	56.9412	High
112	Isobutane	75-28-5	6401	FF	0.0572711	57.2711	High
113	Triisopropanolamine	122-20-3	1415	FF	0.0574662	57.4662	High
114	Diphenyl oxide	101-84-8	1847	FF	0.0577133	57.7133	High
115	Ethanol	64-17-5	584	FF	0.0591679	59.1679	High
116	1,2-Dibromo-2,4-dicyanobutane	35691-65-7	4944	FF	0.0598747	59.8747	High
117	Phenanthrene	85-01-8	4254	FF FB	0.0612861	61.2861	High
118	Benzyltrimethylammonium chloride	56-93-9	4600	FF	0.0618712	61.8712	High
119	2-Methylbutane	78-78-4	5468	FF	0.0619617	61.9617	High
120	Naphthalenesulphonic acid, bis (1-methylethyl)-methyl derivatives	99811-86-6	29646	FF	0.0623543	62.3543	High
121	2,6,8-Trimethyl-4-nonanol	123-17-1	9159	FF	0.0624015	62.4015	High
122	1,3,5-Trimethylbenzene	108-67-8	6797	FF FB	0.0630277	63.0277	High
123	Urea	57-13-6	1426	FF	0.0638618	63.8618	High
124	3-Hydroxybutanal	107-89-1	29490	FF	0.0653072	65.3072	High
125	1-Methoxy-2-propanol	107-98-2	4284	FF	0.0657863	65.7863	High
126	2-Ethoxynaphthalene	93-18-5	29643	FF	0.0658777	65.8777	High
127	Methoxyacetic acid	625-45-6	11591	FF	0.066593	66.593	High
128	Morpholinium, 4-ethyl-4-hexadecyl-, ethyl sulfate	78-21-7	29867	FF	0.0679502	67.9502	High
129	Diisopropylnaphthalene	38640-62-9	21869	FF	0.0681389	68.1389	High
130	N-(2-Acryloyloxyethyl)-N-benzyl-N,N-dimethylammonium chloride	46830-22-2	29638	FF	0.068177	68.177	High
131	Coumarin	91-64-5	348	FF	0.070022	70.022	High
132	Sorbic acid	110-44-1	1277	FF	0.0711952	71.1952	High
133	2,4-Hexadienoic acid, potassium salt, (2E,4E)-	24634-61-5	7835	FF	0.0711952	71.1952	High
134	2-Bromo-3-nitrilopropionamide	1113-55-9	29409	FF	0.071788	71.788	High
135	Cyclohexanol	108-93-0	1894	FF	0.0718118	71.8118	High
136	1-Propanol	71-23-8	1739	FF	0.0720435	72.0435	High
137	Glycine, N-(hydroxymethyl)-, monosodium salt	70161-44-3	15799	FF	0.0729007	72.9007	High
138	4-Methoxyphenol	150-76-5	828	FF	0.0731684	73.1684	High
139	3-(Dimethylamino)propylamine	109-55-7	5102	FF	0.0734419	73.4419	High
140	Di-sec-butylphenol	31291-60-8	29533	FF	0.073945	73.945	High
141	4-Methyl-2-pentanone	108-10-1	1889	FF	0.0742542	74.2542	High
142	Trimethanolamine	14002-32-5	29836	FF	0.0744452	74.4452	High
143	1,3,5-Triazine-1,3,5(2H,4H,6H)-triethanol	4719-04-4	5394	FF	0.0770499	77.0499	High
144	Glycolic acid	79-14-1	5363	FF	0.0772748	77.2748	High
145	Glycolic acid sodium salt	2836-32-0	27153	FF	0.0772748	77.2748	High
146	Glycerol	56-81-5	662	FF	0.0776431	77.6431	High
147	2,6-Dichlorophenol	87-65-0	5004	FB	0.0778932	77.8932	High
148	1-[2-(2-Methoxy-1-methylethoxy)-1-methylethoxy]-2-propanol	20324-33-8	1616	FF	0.0788887	78.8887	High
149	Diisobutyl ketone	108-83-8	5080	FF	0.0806868	80.6868	High
150	Isobutene	115-11-7	748	FF	0.0809916	80.9916	High
151	Triethyl citrate	77-93-0	20701	FF	0.081251	81.251	High
152	Isopropanol	67-63-0	762	FF FB	0.0813922	81.3922	High
153	Propionic acid	79-09-4	5961	FB	0.0822087	82.2087	High
154	2,2-Dibromopropanediamide	73003-80-2	29405	FF	0.0824697	82.4697	High
155	tert-Butyl hydroperoxide	75-91-2	4693	FF	0.0834695	83.4695	High
156	2-Methylpyridine	109-06-8	1899	FB	0.084072	84.072	High
157	p-Xylene	106-42-3	1868	FF	0.0854777	85.4777	High
158	Dibromoacetonitrile	3252-43-5	4940	FF	0.0882632	88.2632	High
159	Daidzein	486-66-8	2310	FF	0.0885248	88.5248	High
160	1,3,5-Triazine	290-87-9	31361	FF	0.0890751	89.0751	High
161	Dapsone	80-08-0	371	FF	0.090797	90.797	High
162	1,2,4-Trimethylbenzene	95-63-6	1402	FF FB	0.0915098	91.5098	High
163	Pyrimidine	289-95-2	29850	FF	0.0916745	91.6745	High
164	3,7-Dimethyl-2,6-octadienal	5392-40-5	4836	FF	0.0918445	91.8445	High
165	Lactose	63-42-3	3193	FF	0.0925673	92.5673	High
166	alpha-Lactose monohydrate	5989-81-1	31367	FF	0.0925673	92.5673	High
167	Phosphonic acid (dimethylamino(methylene))	29712-30-9	29676	FF	0.0933127	93.3127	High
168	Acetaldehyde	75-07-0	2	FF	0.0946254	94.6254	High
169	p-Cresol	106-44-5	1869	FB	0.0954769	95.4769	High
170	Isopentyl alcohol	123-51-3	5469	FF	0.0955786	95.5786	High
171	Butane	106-97-8	4665	FF	0.0957388	95.7388	High
172	4,6-Dimethyl-2-heptanone	19549-80-5	31358	FF	0.0961513	96.1513	High
173	C.I. Solvent Red 26	4477-79-6	29416	FF	0.0983238	98.3238	High
174	1-Propanesulfonic acid	5284-66-2	29853	FF	0.100997	100.997	High
175	N,N'-Dibutylthiourea	109-46-6	22187	FF	0.101261	101.261	High
176	2,2'-(diazene-1,2-diyldiethane-1,1-diyl)bis-4,5-dihydro-1H-imidazole dihydrochl	27776-21-2	29404	FF	0.101479	101.479	High
177	Tripropylene glycol monomethyl ether	25498-49-1	9329	FF	0.10189	101.89	High
178	1,2,3-Trimethylbenzene	526-73-8	27750	FF	0.102542	102.542	High
179	Glycine, N,N-bis(carboxymethyl)-, trisodium salt	5064-31-3	7587	FF	0.103048	103.048	High
180	Methylene bis(thiocyanate)	6317-18-6	5599	FF	0.103378	103.378	High
181	Bis(1-methylethyl)naphthalenesulfonic acid, cyclohexylamine salt	68425-61-6	29485	FF	0.104622	104.622	High
182	Naphthalenesulfonic acid, bis(1-methylethyl)-	28757-00-8	29644	FF	0.104622	104.622	High
183	Dipropylene glycol	25265-71-8	5186	FF	0.107334	107.334	High
184	Sodium hydroxymethanesulfonate	870-72-4	7328	FF	0.108736	108.736	High
185	Citronellol	106-22-9	6726	FF	0.109133	109.133	High
186	FD&C Yellow 5	1934-21-0	1455	FF	0.113678	113.678	High
187	2-Phosphono-1,2,4-butanetricarboxylic acid	37971-36-1	7999	FF	0.114303	114.303	High
188	2-Phosphonobutane-1,2,4-tricarboxylic acid, potassium salt (1:x)	93858-78-7	29417	FF	0.114303	114.303	High
189	Fumaric acid	110-17-8	1518	FF	0.115652	115.652	High
190	Sodium maleate (1:x)	18016-19-8	29879	FF	0.115652	115.652	High
191	p-Cymene	99-87-6	6645	FB	0.115774	115.774	High
192	Nitrilotriacetamide	4862-18-4	29648	FF	0.115935	115.935	High
193	Ethyl lactate	97-64-3	9127	FF	0.116251	116.251	High
194	2,2'-Azobis(2-amidinopropane) dihydrochloride	2997-92-4	29715	FF	0.118029	118.029	High
195	Diisopropanolamine	110-97-4	179	FF	0.118452	118.452	High
196	(13Z)-N,N-bis(2-hydroxyethyl)-N-methyldocos-13-en-1-aminium chloride	120086-58-0	29436	FF	0.119114	119.114	High
197	L-Glutamic acid	56-86-0	659	FF	0.119637	119.637	High
198	Sodium formate	141-53-7	7090	FF	0.124897	124.897	Medium
199	Formic acid, potassium salt	590-29-4	9626	FF	0.124897	124.897	Medium
200	Aminotrimethylene phosphonic acid	6419-19-8	7624	FF	0.12494	124.94	High
201	[Nitrilotris(methylene)]tris-phosphonic acid pentasodium salt	2235-43-0	9232	FF	0.12494	124.94	High
202	Butanoic acid	107-92-6	1515	FB	0.125085	125.085	High
203	Acetyltriethyl citrate	77-89-4	24576	FF	0.128205	128.205	High
204	Sodium C14-16 alpha-olefin sulfonate	68439-57-6	29834	FF	0.128516	128.516	High
205	Dimethyl succinate	106-65-0	5152	FF	0.130656	130.656	High
206	Sodium thiocyanate	540-72-7	1343	FF	0.132245	132.245	Medium
207	Thiocyanic acid, ammonium salt	1762-95-4	9653	FF	0.132245	132.245	Medium
208	Isovaleric acid	503-74-2	9182	FB	0.132548	132.548	High
209	3-Phenylprop-2-enal	104-55-2	4835	FF	0.135687	135.687	High
210	Sodium bicarbonate	144-55-8	1269	FF	0.136804	136.804	High
211	Sodium carbonate	497-19-8	9621	FF	0.136804	136.804	High
212	Ammonium hydrogen carbonate	1066-33-7	15618	FF	0.136804	136.804	High
213	Carbonic acid, dipotassium salt	584-08-7	16245	FF	0.136804	136.804	High
214	Sodium sesquicarbonate	533-96-0	29605	FF	0.136804	136.804	High
215	Carbon dioxide	124-38-9	7028	FF FB	0.136941	136.941	High
216	Glycine, N-(carboxymethyl)-N-(2-hydroxyethyl)-, disodium salt	135-37-5	22008	FF	0.138627	138.627	Medium
217	Sorbitan, monooctadecanoate	1338-41-6	7396	FF	0.13948	139.48	High
218	2-Propenoic acid, 2-(2-hydroxyethoxy)ethyl ester	13533-05-6	29418	FF	0.143798	143.798	High
219	Sodium xylenesulfonate	1300-72-7	6302	FF	0.144073	144.073	High
220	Tetrakis(hydroxymethyl)phosphonium sulfate	55566-30-8	1331	FF	0.147626	147.626	High
221	Thioglycolic acid	68-11-1	6141	FF	0.148996	148.996	High
222	Acetic acid, mercapto-, monoammonium salt	5421-46-5	7599	FF	0.148996	148.996	High
223	N-Methyldiethanolamine	105-59-9	5591	FF	0.149182	149.182	High
224	Bicine	150-25-4	21669	FF	0.154585	154.585	Medium
225	Sodium 2-mercaptobenzothiolate	2492-26-4	6035	FF	0.155977	155.977	High
226	Lactic acid	50-21-5	3192	FF	0.157264	157.264	High
227	L-Lactic acid	79-33-4	14689	FF	0.157264	157.264	High
228	D-Lactic acid	10326-41-7	27030	FF	0.157264	157.264	High
229	Sodium dl-lactate	72-17-3	31368	FF	0.157264	157.264	High
230	Sodium l-lactate	867-56-1	31369	FF	0.157264	157.264	High
231	Ammonium lactate	515-98-0	31372	FF	0.157264	157.264	High
232	Benzenesulfonic acid, dodecyl-, branched, compds. with 2-propanamine	90218-35-2	29542	FF	0.160834	160.834	High
233	Glyoxylic acid	298-12-4	1594	FF	0.162847	162.847	High
234	N,N,N-Trimethyloctadecan-1-aminium chloride	112-03-8	6902	FF	0.164722	164.722	High
235	N,N,N-Trimethyl-3-((1-oxooctadecyl)amino)-1-propanaminium methyl sulfate	19277-88-4	29720	FF	0.165999	165.999	High
236	Hexadecyltrimethylammonium bromide	57-09-0	17028	FF	0.16744	167.44	High
237	Coconut trimethylammonium chloride	61789-18-2	6900	FF	0.16764	167.64	High
238	Quaternary ammonium compounds, di-C8-10-alkyldimethyl, chlorides	68424-95-3	15491	FF	0.16847	168.47	High
239	4-Hydroxy-3-methoxybenzaldehyde	121-33-5	1969	FF	0.168753	168.753	High
240	Butyl glycidyl ether	2426-08-6	4691	FF	0.16877	168.77	High
241	Cyclohexane	110-82-7	1923	FF	0.173354	173.354	High
242	2-Mercaptoethanol	60-24-2	6343	FF	0.173538	173.538	High
243	2-Hydroxy-N,N-bis(2-hydroxyethyl)-N-methylethanaminium chloride	7006-59-9	31363	FF	0.176782	176.782	High
244	Benzenesulfonic acid, (1-methylethyl)-,	37953-05-2	24932	FF	0.179521	179.521	High
245	2-Ethyl-2-hexenal	645-62-5	5295	FF	0.180127	180.127	High
246	Ammonium acetate	631-61-8	3873	FF	0.18331	183.31	High
247	Acetic acid	64-19-7	4394	FF FB	0.18331	183.31	High
248	Potassium acetate	127-08-2	7043	FF	0.18331	183.31	High
249	Sodium acetate	127-09-3	7044	FF	0.18331	183.31	High
250	Sodium diacetate	126-96-5	14909	FF	0.18331	183.31	High
251	FD&C Yellow 6	2783-94-0	1456	FF	0.18491	184.91	High
252	1-Ethyl-2-methylbenzene	611-14-3	29477	FF	0.193058	193.058	High
253	tert-Butyl perbenzoate	614-45-9	4699	FF	0.194117	194.117	High
254	N-Oleyl diethanolamide	13127-82-7	22213	FF	0.197071	197.071	High
255	D&C Red No. 33	3567-66-6	24562	FF	0.198479	198.479	High
256	Alkyl* dimethyl ethylbenzyl ammonium chloride *(60%C14, 30%C16, 5%C12, 5%C18)	68956-79-6	14321	FF	0.199132	199.132	High
257	Acetic anhydride	108-24-7	4395	FF	0.199319	199.319	High
258	sec-Butylbenzene	135-98-8	2333	FB	0.20084	200.84	High
259	2-(Dibutylamino)ethanol	102-81-8	4953	FF	0.201897	201.897	High
260	Ethyl acetoacetate	141-97-9	7092	FF	0.204973	204.973	High
261	Alkyl* dimethyl ethylbenzyl ammonium chloride *(50%C12, 30%C14, 17%C16, 3%C18)	85409-23-0_1	14320	FF	0.205076	205.076	High
262	Decyldimethylamine	1120-24-7	29525	FF	0.207243	207.243	High
263	1,2-Dimethylbenzene	95-47-6	1807	FF	0.207708	207.708	High
264	N,N-Dimethyldecylamine oxide	2605-79-0	22190	FF	0.209339	209.339	High
265	N-Methyl-N-hydroxyethyl-N-hydroxyethoxyethylamine	68213-98-9	29553	FF	0.209655	209.655	High
266	2-Methylpropanoic acid	79-31-2	1636	FB	0.213912	213.912	High
267	1-Octadecanamine, N,N-dimethyl-	124-28-7	7026	FF	0.213925	213.925	High
268	N,N-dimethyloctadecylamine hydrochloride	1613-17-8	29639	FF	0.213925	213.925	High
269	C10-16-Alkyldimethylamines oxides	70592-80-2	8992	FF	0.214458	214.458	High
270	Triethanolamine	102-71-6	1392	FF	0.216954	216.954	High
271	Acetic acid, hydroxy-, reaction products with triethanolamine	68442-62-6	29800	FF	0.216954	216.954	High
272	Triethanolamine hydrochloride	637-39-8	30893	FF	0.216954	216.954	High
273	Pentane	109-66-0	5846	FF	0.219574	219.574	High
274	Methylcyclohexane	108-87-2	27733	FF	0.22074	220.74	High
275	Triethanolamine hydroxyacetate	68299-02-5	29764	FF	0.224192	224.192	High
276	Benzenesulfonic acid, (1-methylethyl)-, sodium salt	28348-53-0	7941	FF	0.231818	231.818	High
277	Benzenesulfonic acid, (1-methylethyl)-, ammonium salt	37475-88-0	7995	FF	0.231818	231.818	High
278	Lauryl hydroxysultaine	13197-76-7	29825	FF	0.233435	233.435	High
279	D-Gluconic acid	526-95-4	7169	FF	0.237469	237.469	High
280	Sodium D-gluconate	527-07-1	7170	FF	0.237469	237.469	High
281	Gluconic acid	133-42-6	22000	FF	0.237469	237.469	High
282	Benzenesulfonic acid	98-11-3	4568	FF	0.248762	248.762	High
283	Trisodium ethylenediaminetriacetate	19019-43-3	29768	FF	0.252464	252.464	Medium
284	Peracetic acid	79-21-0	5853	FF	0.252936	252.936	High
285	Butyl lactate	138-22-7	22196	FF	0.268215	268.215	High
286	Diethanolamine	111-42-2	1932	FF	0.271662	271.662	High
287	Dimethyl glutarate	1119-40-0	5122	FF	0.275988	275.988	High
288	Diethylenetriamine	111-40-0	5050	FF	0.278952	278.952	High
289	1,6-Hexanediamine	124-09-4	4922	FF	0.280153	280.153	High
290	1,6-Hexanediamine dihydrochloride	6055-52-3	9991	FF	0.280153	280.153	High
291	Docusate sodium	577-11-7	2959	FF	0.280181	280.181	High
292	Ethyl benzoate	93-89-0	18696	FF	0.281215	281.215	High
293	D-Glucitol	50-70-4	3588	FF	0.290944	290.944	High
294	4-Ethyloct-1-yn-3-ol	5877-42-9	24697	FF	0.292509	292.509	High
295	Pentanoic acid	109-52-4	1655	FB	0.294184	294.184	High
296	Butyryl trihexyl citrate	82469-79-2	27535	FF	0.295952	295.952	High
297	1-Pentanol	71-41-0	1741	FF	0.296092	296.092	High
298	1-Octadecanamine, acetate (1:1)	2190-04-7	29880	FF	0.296796	296.796	High
299	Methyl salicylate	119-36-8	5659	FF	0.297481	297.481	High
300	1-Tetradecene	1120-36-1	7367	FF	0.306098	306.098	High
301	Alcohols, C9-11-iso-, C10-rich, ethoxylated	78330-20-8	29434	FF	0.308621	308.621	High
302	Sodium bis(tridecyl) sulfobutanedioate	2673-22-5	29491	FF	0.311318	311.318	Medium
303	1-Hexadecene	629-73-2	7269	FF	0.313251	313.251	High
304	1-Eicosene	3452-07-1	9257	FF	0.31399	313.99	High
305	Alkenes, C>10 .alpha.-	64743-02-8	8257	FF	0.314956	314.956	High
306	1-Octadecene	112-88-9	6932	FF	0.315575	315.575	High
307	1-Dodecyl-2-pyrrolidinone	2687-96-9	22206	FF	0.317982	317.982	High
308	Propanol, 1(or 2)-(2-methoxymethylethoxy)-	34590-94-8	7983	FF	0.318835	318.835	High
309	Fatty acids, C18-unsatd., dimers	61788-89-4	8062	FF	0.324719	324.719	Medium
310	Phosphonic acid, (1-hydroxyethylidene)bis-, potassium salt	67953-76-8	8353	FF	0.328357	328.357	High
311	Phosphonic acid, (1-hydroxyethylidene)bis-, tetrasodium salt	3794-83-0	9663	FF	0.328357	328.357	High
312	Amaranth	915-67-3	1232	FF	0.332021	332.021	High
313	Oleic acid	112-80-1	5809	FF	0.333208	333.208	High
314	Potassium oleate	143-18-0	5949	FF	0.333208	333.208	High
315	Tributyltetradecylphosphonium chloride	81741-28-8	14997	FF	0.33852	338.52	High
316	1-Hexanol	111-27-3	1931	FF	0.341307	341.307	High
317	2-Butanone oxime	96-29-7	1821	FF	0.34314	343.14	High
318	Sodium caprylamphopropionate	68610-44-6	29736	FF	0.343937	343.937	High
319	Diethylene glycol monomethyl ether	111-77-3	5049	FF	0.347877	347.877	High
320	Alcohols, C12-14-secondary	126950-60-5	29431	FF	0.37401	374.01	High
321	Propylbenzene	103-65-1	22219	FB	0.38786	387.86	High
322	Glutaraldehyde	111-30-8	5355	FF	0.397929	397.929	High
323	1,2-Ethanediaminium, N,N'-bis[2-[bis(2-hydroxyethyl)methylammonio]ethyl]-N,N'-b	138879-94-4	29510	FF	0.408764	408.764	Medium
324	Isooctanol	26952-21-6	9457	FF	0.410455	410.455	High
325	Dimethyl adipate	627-93-0	5096	FF	0.418297	418.297	High
326	Trisodium ethylenediaminetetraacetate	150-38-9	556	FF	0.432801	432.801	Medium
327	Ethylenediaminetetraacetic acid	60-00-4	2977	FF	0.432801	432.801	Medium
328	Ethylenediaminetetraacetic acid tetrasodium salt	64-02-8	6350	FF	0.432801	432.801	Medium
329	Ethylenediaminetetraacetic acid, disodium salt	139-33-3	7073	FF	0.432801	432.801	Medium
330	Disodium ethylenediaminetetraacetate dihydrate	6381-92-6	29535	FF	0.432801	432.801	Medium
331	Sodium benzoate	532-32-1	140	FF	0.436445	436.445	High
332	Hexane	110-54-3	1917	FF	0.437672	437.672	High
333	Benzylhexadecyldimethylammonium chloride	122-18-9	21665	FF	0.437706	437.706	High
334	C12-14 tert-alkyl ethoxylated amines	73138-27-9	29493	FF	0.441365	441.365	High
335	Ethyl salicylate	118-61-6	1958	FF	0.443669	443.669	High
336	Poly(oxy-1,2-ethanediyl), .alpha.-(octylphenyl)-.omega.-hydroxy-, branched	68987-90-6	8944	FF	0.448877	448.877	High
337	C.I. Acid violet 12, disodium salt	6625-46-3	21715	FF	0.450624	450.624	High
338	Tetradecyldimethylbenzylammonium chloride	139-08-2	8460	FF	0.450772	450.772	High
339	1-Octanol	111-87-5	1940	FF	0.453466	453.466	High
340	Benzyldimethyldodecylammonium chloride	139-07-1	14317	FF	0.460925	460.925	High
341	Disodium ethylenediaminediacetate	38011-25-5	29534	FF	0.475314	475.314	Medium
342	Diethylbenzene	25340-17-4	7866	FF	0.479181	479.181	High
343	Glycine, N-[2-[bis(carboxymethyl)amino]ethyl]-N-(2-hydroxyethyl)-, trisodium sa	139-89-9	7075	FF	0.48207	482.07	Medium
344	Sodium ethasulfate	126-92-1	6033	FF	0.483308	483.308	High
345	1-Decanol	112-30-1	1946	FF	0.493545	493.545	High
346	Sulfuric acid, mono-C12-18-alkyl esters, sodium salts	68955-19-1	8918	FF	0.498214	498.214	High
347	Triethylenetetramine	112-24-3	3702	FF	0.499112	499.112	High
348	Ethanol, 2,2',2''-nitrilotris-, tris(dihydrogen phosphate) (ester), sodium salt	68171-29-9	9418	FF	0.499388	499.388	High
349	Sodium octyl sulfate	142-31-4	16226	FF	0.49984	499.84	High
350	Sulfuric acid, mono-C6-10-alkyl esters, ammonium salts	68187-17-7	29882	FF	0.49984	499.84	High
351	Diethylene glycol	111-46-6	462	FF	0.505024	505.024	High
352	Heptane	142-82-5	4127	FF	0.506111	506.111	High
353	Sodium decyl sulfate	142-87-0	16229	FF	0.507308	507.308	High
354	Sodium dodecyl sulfate	151-21-3	6031	FF	0.507736	507.736	High
355	Ammonium dodecyl sulfate	2235-54-3	7462	FF	0.507736	507.736	High
356	1-Undecanol	112-42-5	6915	FF	0.508411	508.411	High
357	2,2'-(Octadecylimino)diethanol	10213-78-2	16311	FF	0.509403	509.403	High
358	2,2'-[Ethane-1,2-diylbis(oxy)]diethanamine	929-59-9	24742	FF	0.512518	512.518	High
359	1-Tridecanol	112-70-9	1947	FF	0.529395	529.395	High
360	Sodium 1-octanesulfonate	5324-84-5	7595	FF	0.554729	554.729	High
361	1-(Alkyl* amino)-3-aminopropane *(42%C12, 26%C18, 15%C14, 8%C16, 5%C10, 4%C8)	68155-37-3	28032	FF	0.555407	555.407	High
362	Alcohols, C11-14-iso-, C13-rich	68526-86-3	8687	FF	0.557805	557.805	High
363	Hexanoic acid	142-62-1	1607	FB	0.558369	558.369	High
364	Acetic acid, C6-8-branched alkyl esters	90438-79-2	9065	FF	0.561719	561.719	High
365	1-Butoxy-2-propanol	5131-66-8	7589	FF	0.56338	563.38	High
366	Alkanes, C12-14-iso-	68551-19-9	8714	FF	0.565237	565.237	High
367	2-Butoxy-1-propanol	15821-83-7	21399	FF	0.566317	566.317	High
368	C.I. Acid Red 1	3734-67-6	24663	FF	0.572343	572.343	High
369	Alkanes, C13-16-iso-	68551-20-2	8715	FF	0.583157	583.157	High
370	Sodium salicylate	54-21-7	1708	FF	0.597655	597.655	High
371	2-Ethyl-1-hexanol	104-76-7	605	FF	0.605042	605.042	High
372	Alcohols, C7-9-iso-, C8-rich, ethoxylated	78330-19-5	29548	FF	0.620353	620.353	High
373	Heptanoic acid	111-14-8	1600	FB	0.622329	622.329	High
374	1,2-Benzisothiazolin-3-one	2634-33-5	12523	FF	0.652037	652.037	High
375	Triethylene glycol	112-27-6	1393	FF	0.657444	657.444	High
376	Alcohols, C11-14-iso-, C13-rich, ethoxylated	78330-21-9	29560	FF	0.660147	660.147	High
377	Phosphonic acid, (((2-[(2-hydroxyethyl)(phosphonomethyl)amino)ethyl)imino]bis(m	129828-36-0	29675	FF	0.688448	688.448	High
378	Pentyl butyrate	540-18-1	21604	FF	0.690617	690.617	High
379	Pentyl acetate	628-63-7	7263	FF	0.719514	719.514	High
380	Undecane	1120-21-4	1689	FF	0.736939	736.939	High
381	Dodecane	112-40-3	6913	FF	0.759916	759.916	High
382	Alkylbenzenesulfonate, linear	42615-29-2	41	FF	0.763348	763.348	High
383	Tridecane	629-50-5	7266	FF	0.778324	778.324	High
384	Tetradecane	629-59-4	7267	FF	0.792564	792.564	High
385	2-(2-Ethoxyethoxy)ethyl acetate	112-15-2	6905	FF	0.804949	804.949	High
386	Benzenesulfonic acid, C10-16-alkyl derivs., compds. with triethanolamine	68584-25-8	8724	FF	0.808269	808.269	High
387	Benzenesulfonic acid, C10-16-alkyl derivs., potassium salts	68584-27-0	29481	FF	0.808269	808.269	High
388	Tetraethylenepentamine	112-57-2	6108	FF	0.815542	815.542	High
389	Calcium dodecylbenzene sulfonate	26264-06-2	7891	FF	0.818954	818.954	High
390	Dodecylbenzenesulfonic acid, monoethanolamine salt	26836-07-7	29540	FF	0.818954	818.954	High
391	Benzamorf	12068-08-5	29541	FF	0.818954	818.954	High
392	Benzenesulfonic acid, C10-16-alkyl derivs., compds. with cyclohexylamine	255043-08-4	29888	FF	0.818954	818.954	High
393	Benzenesulfonic acid, mono-C10-16-alkyl derivs., sodium salts	68081-81-2	9754	FF	0.828248	828.248	High
394	4-Nonylphenol	104-40-5	1857	FF	0.86117	861.17	High
395	Tetraethylene glycol	112-60-7	6922	FF	0.880529	880.529	High
396	2-Dodecylbenzenesulfonic acid- n-(2-aminoethyl)ethane-1,2-diamine(1:1)	40139-72-8	29852	FF	0.897786	897.786	High
397	Alcohols, C6-12, ethoxylated	68439-45-2	21941	FF	0.998301	998.301	High
398	Alcohols, C9-11, ethoxylated	68439-46-3	21944	FF	1.02159	1021.59	High
399	Alcohols, C10-12, ethoxylated	67254-71-1	21942	FF	1.0395	1039.5	High
400	Alcohols, C12-13, ethoxylated	66455-14-9	21929	FF	1.05255	1052.55	High
401	Alcohols, C12-16, ethoxylated	68551-12-2	21588	FF	1.06119	1061.19	High
402	Alcohols, C14-15, ethoxylated	68951-67-7	21934	FF	1.06695	1066.95	High
403	Ethanol, 2-[2-[2-(tridecyloxy)ethoxy]ethoxy]-, hydrogen sulfate, sodium salt	25446-78-0	16457	FF	1.12605	1126.05	Medium
404	Ethoxylated dodecyl alcohol	9002-92-0	5218	FF	1.43616	1436.16	High
405	C10-C16 ethoxylated alcohol	68002-97-1	23993	FF	1.44178	1441.78	High
406	Alcohols, C12-14, ethoxylated propoxylated	68439-51-0	21947	FF	1.44991	1449.91	High
407	Pentaethylenehexamine	4067-16-7	5843	FF	1.47094	1470.94	High
408	Disodium dodecyl(sulphonatophenoxy)benzenesulphonate	28519-02-0	7944	FF	1.59377	1593.77	High
409	2-Ethylhexyl benzoate	5444-75-7	21654	FF	1.74678	1746.78	High
410	Dodecylbenzene	123-01-3	6994	FF	2.03817	2038.17	High
411	Isopropanolamine dodecylbenzene	42504-46-1	29813	FF	2.03817	2038.17	High
412	Benzene, C10-16-alkyl derivs.	68648-87-3	8786	FF	2.0385	2038.5	High
413	Phosphonic acid, [[(phosphonomethyl)imino]bis[2,1-ethanediylnitrilobis(methylen	15827-60-8	7775	FF	2.17211	2172.11	High
414	Phosphonic acid, [[(phosphonomethyl)imino]bis[2,1-ethanediylnitrilobis(methylen	22042-96-2	9321	FF	2.17211	2172.11	High
415	Phosphonic acid, [[(phosphonomethyl)imino]bis[2,1-ethanediylnitrilobis(methylen	70714-66-8	29678	FF	2.17211	2172.11	High
416	Phosphonic acid, [[(phosphonomethyl)imino]bis[6,1-hexanediylnitrilobis(methylen	34690-00-1	9358	FF	2.63172	2631.72	Medium
417	Dioctyl phthalate	117-84-0	1956	FB	4.73778	4737.78	High
